# Supplementary material
Source: MDPI journal article supplement (https://www.mdpi.com/2077-1312/11/3/595)
Supplement: s1 [file s1]

Archive with 4 entries (4 files):
- Khanetal BiologistsGuide bands_Supplemental Material_S2.xlsx
- Khanetal Image Product Summary_Supplemental Materials_S3.xlsx
- Khanetal Satellite Trends Data_Supplemental Materials_S1.xlsx
- Khanetal Spectral Angle Mapping_Supplemental Materials_S4.pdf
