# Supplementary material
Source: MDPI journal article supplement (https://www.mdpi.com/2077-1312/11/3/595)
Supplement: s1 [file s1 › Khanetal BiologistsGuide bands_Supplemental Material_S2.xlsx]

## Sheet: Khan et al Biologist's Guide S2
							wavelength (nm)
							Panchromatic band	Multispectral bands									SWIR bands								CAVIS bands
Company	Sensor	Launch Date	Panchromatic Resolution†	Multispectral Resolution†	Swath Width†	Revisit Rate	Panchromatic	Coastal / Deep Blue	Blue	Green	Yellow	Red	Red Edge / Red Ed-1	Red Ed - 2	Near IR	Near IR2	SWIR 1	SWIR 2	SWIR 3	SWIR 4	SWIR 5	SWIR 6	SWIR 7	SWIR 8	Desert Clouds	Aerosol 1	Green	Aerosol 2	Water 1	Water 2	Water 3	NDVI - SWIR	Cirrus	Snow	Aerosol 3	Aerosol 3 P
MAXAR	WorldView-1	18 Sep 2007	0.50 m	NA	17.6 km	1.7 days	400 - 900
MAXAR	GeoEye-1*	6 Sep 2008	0.41 / 0.49 m**	1.64 m	15.2 km	< 3 days	450 - 800		450 - 510	510 - 580		655 - 690			780 - 920
MAXAR	WorldView-2*	8 Oct 2009	0.46 m	1.84 m	16.4 km	1.1 days	450 - 800	400 - 450	450 - 510	510 - 580	585 - 625	630 - 690	705 - 745		770 - 895	860 - 1040
Airbus	Pleiades-1A	16 Dec 2011	0.50 m	2.00 m	20.0 km	Daily	470 - 830		430 - 550	500 - 620		590 - 710			740 - 940
Airbus	Pleiades-1B	2 Dec 2012	0.50 m	2.00 m	20.0 km	Daily	480 - 830		430 - 550	490 - 610		600-720			750-950
MAXAR	WorldView-3*	13 Aug 2014	0.31 m	1.24 m	13.1 km	<1 per day	450 - 800	397 - 454	445 - 517	507 - 586	580 - 629	626 - 696	698 - 749		765 - 899	857 - 1039	1184 - 1235	1546 - 1598	1636 - 1686	1702 - 1759	2137 - 2191	2174 - 2232	2228 - 2292	2285 - 2373	405 - 420	459 - 509	525 - 585	635 - 685	845 - 885	897 - 927	930 - 965	1220 - 1252	1365 - 1405	1620 - 1680	2105 - 2245	2105 - 2245
MAXAR	Worldview-4§	11 Nov 2016	0.30 m	1.24 m	13.1 km	<1 per day	450 - 800		450 - 510	510 - 580		655 - 690			780 - 920
Airbus	Pleiades Neo 3	18 Apr 2021	0.30 m	1.20 m	14.0 km	2x per day	450 - 800	400 - 450	450 - 520	530 - 590		620 - 690	700 - 750		770 - 880
Airbus	Pleiades Neo 4	16 Aug 2021	0.30 m	1.20 m	14.0 km	2x per day	450 - 800	400 - 450	450 - 520	530 - 590		620 - 690	700 - 750		770 - 880
China Siwei	SuperView Neo	29 Aug 2022	0.30 m	1.20 m	12.0 km	Daily	450 - 890		450 - 520	520 - 590		630 - 690			770 - 890
Airbus	Pleiades Neo 5 & 6 §§	20 Dec 2022	0.30 m	1.20 m	14.0 km	2x per day	450 - 800	400 - 450	450 - 520	530 - 590		620 - 690	700 - 750		770 - 880
MAXAR	Worldview Legion	Estimated: 2023	0.29 m	0.48 m	9.0 km	15x per day	450 - 800	400 - 450	450 - 510	510 - 580	585 - 625	630 - 690	695 - 715	730 - 750	780 - 920
Planet	Pelican	Estimated: 2023	0.30 m	--	--	30x per day
Albedo	Albedo	Estimated: 2024	0.10 m	0.40 m	7.0 km	15 days	400 - 700		450 - 510	510 - 580		630 - 690			770 - 895
	†Values obtained at nadir
	*Utilized by the Geospatial Artificial Intelligence for Animals (GAIA) project
	**During the late summer of 2013, the orbit altitude of the GeoEye satellite sensor was raised to 770 Km/ 478 Miles. GeoEye-1 new nadir ground sample distance (GSD) is 46cm compared to the previous GSD of 41cm.
	§As of early 2019, WorldView-4 is in non-recoverable status and no longer collecting new imagery
	§§Both satellites were lost during a failed launch mission on December 20, 2022
