# Supplementary material
Source: MDPI journal article supplement (https://www.mdpi.com/2077-1312/11/3/595)
Supplement: s1 [file s1 › Khanetal Image Product Summary_Supplemental Materials_S3.xlsx]

## Sheet: Sheet1
Website	Product	Other Names	Bands	Pansharpened	Projected	Radiometric Corrected	Orthorectified
EarthExplorer	1B	Basic Imagery, System Ready	8/1	N	N	Y	N
EarthExplorer	2A	Standard Imagery, View-Ready 2A	8/1	N	N	Y	N
EarthExplorer	OR2A	Ortho Ready, Ortho Ready Standard, View-Ready OR2A	3	N	Y	Y	Y
EarthExplorer	1BS	Basic 1B Stereo	8/1	N	Y	Y	N
EarthExplorer	OR2AS	Ortho Ready Stereo, View-Ready OR2A Stereo,	3	N	Y	Y	N
EarthExplorer	PAN	Pansharpened, True Color	3	Y	Y	Y	Y
G-EDG Archive	1B	Basic All Bands	8/1	N	N	Y	N
G-EDG Archive	3D	Ortho All Bands, Ortho Ready	8/1	N	Y (by lat/lon)	Y	Y
G-EDG Archive	3D	Ortho All MS Bands, Ortho Ready MS Bands	8	N	Y (by lat/lon)	Y	Y
G-EDG Archive	3D	Ortho Color Infared	3	Y	Y (by UTM)	Y	Y
G-EDG Archive	3D	Ortho Natural Color, Ortho Ready Natural Color	3	Y	Y (by UTM)	Y	Y
G-EDG Archive	3D	Ortho Panchromatic	1	N	Y (by lat/lon)	Y	Y
G-EDG Online	1B	Basic All Bands, System-Ready	8/1	N	N	Y	N
G-EDG Online	3D	Ortho All Bands, Ortho Ready	8/1	N	Y (user specific)	Y	Y
G-EDG Online	3D	Ortho All MS Bands, Ortho Ready MS Bands	8	N	Y (user specific)	Y	Y
G-EDG Online	3D	Ortho Color Infared	3	Y	Y (user specific)	Y	Y
G-EDG Online	3D	Ortho Natural Color, Ortho Ready Natural Color	3	Y	Y (user specific)	Y	Y
G-EDG Online	3D	Ortho Panchromatic	1	N	Y (user specific)	Y	Y
