# Supplementary material
Source: MDPI journal article supplement (https://www.mdpi.com/2077-1312/11/3/595)
Supplement: s1 [file s1 › Khanetal Satellite Trends Data_Supplemental Materials_S1.xlsx]

## Sheet: Database
Name	Reference	Program or Operator	Country	Launch Date	Launch Year	Spatial Resolution (m)	Reference for Spatial Resolution	Additional References:
Landsat 1	Belward and Skøien (2015)	Landsat	USA	23.07.1972	1972	79	Belward and Skøien (2015)
Meteor-P1	Belward and Skøien (2015)	Meteor	Russia	09.07.1974	1974	120	Belward and Skøien (2015)
Landsat 2	Belward and Skøien (2015)	Landsat	USA	22.01.1975	1975	79	Belward and Skøien (2015)
Meteor-P2	Belward and Skøien (2015)	Meteor	Russia	15.05.1976	1976	120	Belward and Skøien (2015)
DMSP-F01	Belward and Skøien (2015)	DMSP	USA	11.09.1976	1976	560	Belward and Skøien (2015)
DMSP-F02	Belward and Skøien (2015)	DMSP	USA	04.06.1977	1977	560	Belward and Skøien (2015)
Meteor-P3	Belward and Skøien (2015)	Meteor	Russia	29.07.1977	1977	120	Belward and Skøien (2015)
Landsat 3	Belward and Skøien (2015)	Landsat	USA	05.03.1978	1978	79	Belward and Skøien (2015)
DMSP-F03	Belward and Skøien (2015)	DMSP	USA	30.04.1978	1978	560	Belward and Skøien (2015)
Seasat	Belward and Skøien (2015)	Seasat	USA	27.06.1978	1978	unknown
TIROS N	Belward and Skøien (2015)	NOAA	USA	13.10.1978	1978	1100	Belward and Skøien (2015)
Nimbus-7	Belward and Skøien (2015)	Nimbus	USA	24.10.1978	1978	825	Belward and Skøien (2015)
Meteor-P4	Belward and Skøien (2015)	Meteor	Russia	25.01.1979	1979	120	Belward and Skøien (2015)
DMSP-F04	Belward and Skøien (2015)	DMSP	USA	06.06.1979	1979	560	Belward and Skøien (2015)
Bhaskara-1	Belward and Skøien (2015)	Bhaskara	India	07.06.1979	1979	1000	Belward and Skøien (2015)
NOAA 6	Belward and Skøien (2015)	NOAA	USA	27.06.1979	1979	1100	Belward and Skøien (2015)
Meteor-P5	Belward and Skøien (2015)	Meteor	Russia	18.06.1980	1980	40	Belward and Skøien (2015)
NOAA 7	Belward and Skøien (2015)	NOAA	USA	23.06.1981	1981	1100	Belward and Skøien (2015)
Meteor-P6	Belward and Skøien (2015)	Meteor	Russia	10.07.1981	1981	120	Belward and Skøien (2015)
Bhaskara-2	Belward and Skøien (2015)	Bhaskrara	India	20.11.1981	1981	1000	Belward and Skøien (2015)
Landsat 4	Belward and Skøien (2015)	Landsat	USA	16.07.1982	1982	30	Belward and Skøien (2015)
DMSP-F06	Belward and Skøien (2015)	DMSP	USA	21.12.1982	1982	560	Belward and Skøien (2015)
NOAA 8	Belward and Skøien (2015)	NOAA	USA	28.03.1983	1983	1100	Belward and Skøien (2015)
Okean-OE-N1	Belward and Skøien (2015)	Okean	Russia	28.09.1983	1983	unknown
DMSP-F07	Belward and Skøien (2015)	DMSP	USA	18.11.1983	1983	560	Belward and Skøien (2015)
Landsat 5	Belward and Skøien (2015)	Landsat	USA	01.03.1984	1984	30	Belward and Skøien (2015)
Okean-OE-N2	Belward and Skøien (2015)	Okean	Russia	28.09.1984	1984	unknown
NOAA 9	Belward and Skøien (2015)	NOAA	USA	24.12.1984	1984	1100	Belward and Skøien (2015)
Resurs 01-1	Belward and Skøien (2015)	Resurs	Russia	03.10.1985	1985	160	Belward and Skøien (2015)
SPOT 1	Belward and Skøien (2015)	SPOT	France Belgium Sweden	22.02.1986	1986	20	Belward and Skøien (2015)
Okean-O1-1	Belward and Skøien (2015)	Okean	Russia	29.07.1986	1986	200	Belward and Skøien (2015)
NOAA 10	Belward and Skøien (2015)	NOAA	USA	17.09.1986	1986	1100	Belward and Skøien (2015)
MOS 1	Belward and Skøien (2015)	MOS	Japan	19.02.1987	1987	50	Belward and Skøien (2015)
DMSP-F08	Belward and Skøien (2015)	DMSP	USA	18.06.1987	1987	560	Belward and Skøien (2015)
Okean-O1-2	Belward and Skøien (2015)	Okean	Russia	16.07.1987	1987	200	Belward and Skøien (2015)
DMSP-F09	Belward and Skøien (2015)	DMSP	USA	03.02.1988	1988	560	Belward and Skøien (2015)
IRS 1A	Belward and Skøien (2015)	IRS	India	17.03.1988	1988	36	Belward and Skøien (2015)
Resurs O2	Belward and Skøien (2015)	Resurs	Russia	20.04.1988	1988	40	Belward and Skøien (2015)
Okean-O1-3	Belward and Skøien (2015)	Okean	Russia	05.07.1988	1988	200	Belward and Skøien (2015)
FY-1A	Belward and Skøien (2015)	Feng-Yun	China	07.09.1988	1988	unknown
NOAA 11	Belward and Skøien (2015)	NOAA	USA	24.09.1988	1988	1100	Belward and Skøien (2015)
SPOT 2	Belward and Skøien (2015)	SPOT	France Belgium Sweden	21.01.1990	1990	20	Belward and Skøien (2015)
Okean-O1-5	Belward and Skøien (2015)	Okean	Russia	28.02.1990	1990	200	Belward and Skøien (2015)
FY-1B	Belward and Skøien (2015)	Feng-Yun	China	03.09.1990	1990	unknown
DMSP-F10	Belward and Skøien (2015)	DMSP	USA	01.12.1990	1990	560	Belward and Skøien (2015)
Almaz 1B	Belward and Skøien (2015)	Almaz	Russia	31.03.1991	1991	unknown
NOAA 12	Belward and Skøien (2015)	NOAA	USA	14.05.1991	1991	unknown
Okean-O1-6	Belward and Skøien (2015)	Okean	Russia	04.06.1991	1991	200	Belward and Skøien (2015)
ERS 1	Belward and Skøien (2015)	ERS	ESA	17.07.1991	1991	1000	Belward and Skøien (2015)
IRS 1B	Belward and Skøien (2015)	IRS	India	29.08.1991	1991	36	Belward and Skøien (2015)
DMSP-F11	Belward and Skøien (2015)	DMSP	USA	28.11.1991	1991	560	Belward and Skøien (2015)
JERS 1	Belward and Skøien (2015)	JERS	Japan	11.02.1992	1992	20	Belward and Skøien (2015)
SPOT 3	Belward and Skøien (2015)	SPOT	France Belgium Sweden	25.09.1993	1993	20	Belward and Skøien (2015)
TUBSAT-B	Belward and Skøien (2015)	TUBSAT	Germany	25.01.1994	1994	unknown
DMSP-F12	Belward and Skøien (2015)	DMSP	USA	29.08.1994	1994	560	Belward and Skøien (2015)
Okean-O1-7	Belward and Skøien (2015)	Okean	Ukraine	11.10.1994	1994	200	Belward and Skøien (2015)
Resurs 01 3	Belward and Skøien (2015)	Resurs	Russia	04.11.1994	1994	34	Belward and Skøien (2015)
NOAA 14	Belward and Skøien (2015)	NOAA	USA	30.12.1994	1994	1100	Belward and Skøien (2015)
DMSP-F13	Belward and Skøien (2015)	DMSP	USA	24.03.1995	1995	560	Belward and Skøien (2015)
ERS 2	Belward and Skøien (2015)	ERS	ESA	21.04.1995	1995	1000	Belward and Skøien (2015)
IRS 1C	Belward and Skøien (2015)	IRS	India	19.05.1995	1995	23.5	Belward and Skøien (2015)
Sich 1	Belward and Skøien (2015)	Okean	Ukraine	31.08.1995	1995	200	Belward and Skøien (2015)
Radarsat 1	Belward and Skøien (2015)	Radarsat	Canada	04.11.1995	1995	unknown
ADEOS 1	Belward and Skøien (2015)	ADEOS	Japan	17.08.1996	1996	16	Belward and Skøien (2015)
DMSP-F14	Belward and Skøien (2015)	DMSP	USA	04.04.1997	1997	560	Belward and Skøien (2015)
Orbview 2	Belward and Skøien (2015)	Orbview	USA	01.08.1997	1997	1100	Belward and Skøien (2015)
IRS 1D	Belward and Skøien (2015)	IRS	India	29.09.1997	1997	23.5	Belward and Skøien (2015)
SPOT 4	Belward and Skøien (2015)	SPOT	France, Belgium, Sweden	24.03.1998	1998	20	Belward and Skøien (2015)
NOAA 15	Belward and Skøien (2015)	NOAA	USA	13.05.1998	1998	1100	Belward and Skøien (2015)
Resurs 01-4	Belward and Skøien (2015)	Resurs	Russia	10.07.1998	1998	34	Belward and Skøien (2015)
TMSat 1	Belward and Skøien (2015)	TMSat	Thailand	10.07.1998	1998	98	Belward and Skøien (2015)
SAC-A	Belward and Skøien (2015)	SAC	Argentina/USA	04.12.1998	1998	unknown
Formosat 1	Belward and Skøien (2015)	Formosat	Taiwan	27.01.1999	1999	800	Belward and Skøien (2015)
SUNSAT	Belward and Skøien (2015)	SUNSAT	South Africa	23.02.1999	1999	15	Belward and Skøien (2015)
Landsat 7	Belward and Skøien (2015)	Landsat	USA	15.04.1999	1999	30	Belward and Skøien (2015)
FY-1C	Belward and Skøien (2015)	Feng-Yun	China	10.05.1999	1999	unknown
DLR-TUBSAT	Belward and Skøien (2015)	TUBSAT	Germany	26.05.1999	1999	unknown
IRS P4	Belward and Skøien (2015)	IRS	India	26.05.1999	1999	360	Belward and Skøien (2015)
Okean-O-1	Belward and Skøien (2015)	Okean	Ukraine	17.07.1999	1999	50	Belward and Skøien (2015)
IKONOS	Belward and Skøien (2015)	GeoEye	USA	24.09.1999	1999	3.3	Belward and Skøien (2015)
CBERS 1	Belward and Skøien (2015)	CBERS	China, Brazil	14.10.1999	1999	20	Belward and Skøien (2015)
DMSP-F15	Belward and Skøien (2015)	DMSP	USA	12.12.1999	1999	560	Belward and Skøien (2015)
Terra	Belward and Skøien (2015)	EOS	USA	18.12.1999	1999	15	Belward and Skøien (2015)
KOMPSAT 1	Belward and Skøien (2015)	KOMPSAT	Korea	20.12.1999	1999	1000	Belward and Skøien (2015)
NOAA 16	Belward and Skøien (2015)	NOAA	USA	21.09.2000	2000	1100	Belward and Skøien (2015)
TiungSAT 1	Belward and Skøien (2015)	TiungSat	Malaysia	26.09.2000	2000	30	Belward and Skøien (2015)
SAC-C	Belward and Skøien (2015)	SAC	Argentina/USA	21.11.2000	2000	unknown
EO 1	Belward and Skøien (2015)	NMP	USA	05.12.2000	2000	30	Belward and Skøien (2015)
EROS A1	Belward and Skøien (2015)	EROS	Israel	05.12.2000	2000	unknown
QuickBird	Belward and Skøien (2015)	WorldView	USA	18.10.2001	2001	2.4	Belward and Skøien (2015)
BIRD	Belward and Skøien (2015)	BIRD	Germany	22.10.2001	2001	14.6	Belward and Skøien (2015)
Proba 1	Belward and Skøien (2015)	Proba	ESA	22.10.2001	2001	17	Belward and Skøien (2015)
Maroc-TUBSAT	Belward and Skøien (2015)	TUBSAT	Marocco	10.12.2001	2001	unknown
Meteor 3M	Belward and Skøien (2015)	Meteor	Russia	10.12.2001	2001	38	Belward and Skøien (2015)
ENVISAT	Belward and Skøien (2015)	Envisat	ESA	01.03.2002	2002	300	Belward and Skøien (2015)
Aqua	Belward and Skøien (2015)	EOS	USA	04.05.2002	2002	250	Belward and Skøien (2015)
SPOT 5	Belward and Skøien (2015)	SPOT	France, Belgium, Sweden	04.05.2002	2002	10	Belward and Skøien (2015)
HY-1A	Belward and Skøien (2015)	HaiYang	China	15.05.2002	2002	250	Belward and Skøien (2015)
FY-1D	Belward and Skøien (2015)	Feng-Yun	China	15.05.2002	2002	unknown
NOAA 17	Belward and Skøien (2015)	NOAA	USA	24.06.2002	2002	unknown
Alsat 1	Belward and Skøien (2015)	DMC	Algeria	28.11.2002	2002	30	Belward and Skøien (2015)
ADEOS 2	Belward and Skøien (2015)	ADEOS	Japan	14.12.2002	2002	unknown
Orbview 3	Belward and Skøien (2015)	GeoEye	USA	26.06.2003	2003	4	Belward and Skøien (2015)
UK-DMC-1	Belward and Skøien (2015)	DMC	UK	27.09.2003	2003	32	Belward and Skøien (2015)
Bilsat 1	Belward and Skøien (2015)	DMC	Turkey	27.09.2003	2003	32	Belward and Skøien (2015)
NigeriaSat 1	Belward and Skøien (2015)	DMC	Nigeria	27.09.2003	2003	32	Belward and Skøien (2015)
Resourcesat 1	Belward and Skøien (2015)	Resourcesat	India	17.10.2003	2003	5.8	Belward and Skøien (2015)
DMSP-F16	Belward and Skøien (2015)	DMSP	USA	18.10.2003	2003	560	Belward and Skøien (2015)
CBERS 2	Belward and Skøien (2015)	CBERS	China, Brazil	21.10.2003	2003	20	Belward and Skøien (2015)
Formosat 2	Belward and Skøien (2015)	Formosat	Taiwan	21.05.2004	2004	8	Belward and Skøien (2015)
Sich 1M	Belward and Skøien (2015)	Okean	Ukraine	24.12.2004	2004	30	Belward and Skøien (2015)
Cartosat 1	Belward and Skøien (2015)	Cartosat	India	05.05.2005	2005	unknown
NOAA 18	Belward and Skøien (2015)	NOAA	USA	20.05.2005	2005	1100	Belward and Skøien (2015)
Monitor E1	Belward and Skøien (2015)	Monitor	Russia	26.08.2005	2005	20	Belward and Skøien (2015)
BJ-1	Belward and Skøien (2015)	DMC	China	27.10.2005	2005	32	Belward and Skøien (2015)
TopSat	Belward and Skøien (2015)	Topsat	UK	27.10.2005	2005	5	Belward and Skøien (2015)
ALOS	Belward and Skøien (2015)	ALOS	Japan	24.01.2006	2006	10	Belward and Skøien (2015)
EROS B	Belward and Skøien (2015)	EROS	Israel	25.04.2006	2006	unknown
Resurs DK	Belward and Skøien (2015)	Resurs	Russia	15.06.2006	2006	3	Belward and Skøien (2015)
KOMPSAT 2	Belward and Skøien (2015)	KOMPSAT	Korea	28.07.2006	2006	4	Belward and Skøien (2015)
MetOp A	Belward and Skøien (2015)	Metop	ESA USA	19.10.2006	2006	1000	Belward and Skøien (2015)
DMSP-F17	Belward and Skøien (2015)	DMSP	USA	04.11.2006	2006	560	Belward and Skøien (2015)
Cartosat 2	Belward and Skøien (2015)	Cartosat	India	10.01.2007	2007	unknown
Lapan-Tubsat	Belward and Skøien (2015)	TUBSAT	Indonesia	10.01.2007	2007	6	Belward and Skøien (2015)
HY-1B	Belward and Skøien (2015)	HaiYang	China	11.04.2007	2007	250	Belward and Skøien (2015)
EgyptSat 1	Belward and Skøien (2015)	Egyptsat	Egypt	17.04.2007	2007	7.8	Belward and Skøien (2015)
CosmoSkyMed 1	Belward and Skøien (2015)	Cosmo-SkyMed	Italy	07.06.2007	2007	unknown
TerraSAR X	Belward and Skøien (2015)	TerraSAR	Germany	15.06.2007	2007	unknown
WorldView 1	Belward and Skøien (2015)	WorldView	USA	18.09.2007	2007	unknown
CBERS 2B	Belward and Skøien (2015)	CBERS	China, Brazil	19.09.2007	2007	20	Belward and Skøien (2015)
CosmoSkyMed 2	Belward and Skøien (2015)	Cosmo-SkyMed	Italy	09.12.2007	2007	unknown
Radarsat 2	Belward and Skøien (2015)	Radarsat	Canada	14.12.2007	2007	unknown
Cartosat 2A	Belward and Skøien (2015)	Cartosat	India	28.04.2008	2008	unknown
IMS-1	Belward and Skøien (2015)	IMS	India	28.04.2008	2008	36	Belward and Skøien (2015)
FY-3A	Belward and Skøien (2015)	Feng-Yun	China	27.05.2008	2008	230	Belward and Skøien (2015)
RapidEye 1A	Belward and Skøien (2015)	RapidEye	Germany	29.08.2008	2008	6.5	Belward and Skøien (2015)
RapidEye 1B	Belward and Skøien (2015)	RapidEye	Germany	29.08.2008	2008	6.5	Belward and Skøien (2015)
RapidEye 1C	Belward and Skøien (2015)	RapidEye	Germany	29.08.2008	2008	6.5	Belward and Skøien (2015)
RapidEye 1D	Belward and Skøien (2015)	RapidEye	Germany	29.08.2008	2008	6.5	Belward and Skøien (2015)
RapidEye 1E	Belward and Skøien (2015)	RapidEye	Germany	29.08.2008	2008	6.5	Belward and Skøien (2015)
HJ-1A	Belward and Skøien (2015)	Huan-Jing	China	06.09.2008	2008	30	Belward and Skøien (2015)
HJ-1B	Belward and Skøien (2015)	Huan-Jing	China	06.09.2008	2008	30	Belward and Skøien (2015)
GeoEye 1	Belward and Skøien (2015)	GeoEye	USA	06.09.2008	2008	1.64	Belward and Skøien (2015)
THEOS	Belward and Skøien (2015)	THEOS	Thailand	01.10.2008	2008	15	Belward and Skøien (2015)
CosmoSkyMed 3	Belward and Skøien (2015)	Cosmo-SkyMed	Italy	24.10.2008	2008	unknown
GOSAT	Belward and Skøien (2015)	GOSAT	Japan	23.01.2009	2009	500	Belward and Skøien (2015)
NOAA 19	Belward and Skøien (2015)	NOAA	USA	06.02.2009	2009	1100	Belward and Skøien (2015)
RazakSAT	Belward and Skøien (2015)	RazakSat	Malaysia	14.07.2009	2009	5	Belward and Skøien (2015)
Dubaisat 1	Belward and Skøien (2015)	Dubaisat	UAE	29.07.2009	2009	5	Belward and Skøien (2015)
UK-DMC-2	Belward and Skøien (2015)	DMC	UK	29.07.2009	2009	22	Belward and Skøien (2015)
Deimos 1	Belward and Skøien (2015)	DMC	Spain	29.07.2009	2009	22	Belward and Skøien (2015)
SumbandilaSat	Belward and Skøien (2015)	SumbandilaSat	South Africa	17.09.2009	2009	6.2	Belward and Skøien (2015)
Meteor M N1	Belward and Skøien (2015)	Meteor	Russia	18.09.2009	2009	60	Belward and Skøien (2015)
Oceansat 2	Belward and Skøien (2015)	Oceansat	India	23.09.2009	2009	360	Belward and Skøien (2015)
WorldView 2	Belward and Skøien (2015)	WorldView	USA	01.10.2009	2009	1.84	Belward and Skøien (2015)
DMSP-F18	Belward and Skøien (2015)	DMSP	USA	18.10.2009	2009	560	Belward and Skøien (2015)
TanDEM-X	Belward and Skøien (2015)	TerraSAR	Germany	21.06.2010	2010	unknown
Cartosat 2B	Belward and Skøien (2015)	Cartosat	India	12.07.2010	2010	unknown
Alsat 2A	Belward and Skøien (2015)	Alsat	Algeria	12.07.2010	2010	10	Belward and Skøien (2015)
TH-1A	Belward and Skøien (2015)	TianHui	China	24.08.2010	2010	10	Belward and Skøien (2015)
FY-3B	Belward and Skøien (2015)	Feng-Yun	China	04.11.2010	2010	230	Belward and Skøien (2015)
CosmoSkyMed 4	Belward and Skøien (2015)	Cosmo-SkyMed	Italy	05.11.2010	2010	unknown
Resourcesat 2	Belward and Skøien (2015)	Resourcesat	India	20.04.2011	2011	23.5	Belward and Skøien (2015)
X-Sat	Belward and Skøien (2015)	X-Sat	Singapore	20.04.2011	2011	10	Belward and Skøien (2015)
Aquarius SAC-D	Belward and Skøien (2015)	SAC	Argentina USA	10.06.2011	2011	300	Belward and Skøien (2015)
NigeriaSat 2	Belward and Skøien (2015)	DMC	Nigeria	17.08.2011	2011	5	Belward and Skøien (2015)
NigeriaSat-X	Belward and Skøien (2015)	DMC	Nigeria	17.08.2011	2011	22	Belward and Skøien (2015)
Sich 2	Belward and Skøien (2015)	Sich	Ukraine	17.08.2011	2011	8.2	Belward and Skøien (2015)
RASAT	Belward and Skøien (2015)	RASAT	Turkey	17.08.2011	2011	15	Belward and Skøien (2015)
Suomi-NPP	Belward and Skøien (2015)	Suomi NPP	USA	28.10.2011	2011	375	Belward and Skøien (2015)
Pleiades -1	Belward and Skøien (2015)	Pleiades	France	17.12.2011	2011	2.8	Belward and Skøien (2015)
SSOT	Belward and Skøien (2015)	SSOT	Chile	17.12.2011	2011	5.8	Belward and Skøien (2015)
ZY-1-2C	Belward and Skøien (2015)	Zi Yuan	China	22.12.2011	2011	5	Belward and Skøien (2015)
RISAT-1	Belward and Skøien (2015)	RISAT	India	26.04.2012	2012	unknown
TH-1B	Belward and Skøien (2015)	TianHui	China	06.05.2012	2012	10	Belward and Skøien (2015)
KOMPSAT 3	Belward and Skøien (2015)	KOMPSAT	Korea	17.05.2012	2012	2.8	Belward and Skøien (2015)
Kanopus VulKan	Belward and Skøien (2015)	Kanopus Vulkan	Russia	22.07.2012	2012	12	Belward and Skøien (2015)
BelKa 2	Belward and Skøien (2015)	BelKa	Belarus	22.07.2012	2012	12	Belward and Skøien (2015)
SPOT 6	Belward and Skøien (2015)	SPOT	France	09.09.2012	2012	8	Belward and Skøien (2015)
MetOp B	Belward and Skøien (2015)	Metop	EU	17.09.2012	2012	1000	Belward and Skøien (2015)
VRSS-1	Belward and Skøien (2015)	VRSS	Venezuela	29.09.2012	2012	10	Belward and Skøien (2015)
HJ-1C	Belward and Skøien (2015)	Huan-Jing	China	18.11.2012	2012	unknown
Pleiades -1B	Belward and Skøien (2015)	Pleiades	France	02.12.2012	2012	2.8	Belward and Skøien (2015)
Gocturk 2	Belward and Skøien (2015)	Gocturk	Turkey	18.12.2012	2012	10	Belward and Skøien (2015)
Landsat 8	Belward and Skøien (2015)	Landsat	USA	11.02.2013	2013	30	Belward and Skøien (2015)
Dove 2	Belward and Skøien (2015)	Planet Labs, Inc.	USA	19.04.2013	2013	unknown
Dove 1	Belward and Skøien (2015)	Planet Labs, Inc.	USA	21.04.2013	2013	unknown
Gaofen 1	Belward and Skøien (2015)	Gaofen	China	26.04.2013	2013	8	Belward and Skøien (2015)
Proba V	Belward and Skøien (2015)	Proba	ESA	07.05.2013	2013	100	Belward and Skøien (2015)
VNREDSat-1A	Belward and Skøien (2015)	VNREDSAT	Vietnam	07.05.2013	2013	10	Belward and Skøien (2015)
Resurs P1	Belward and Skøien (2015)	Resurs	Russia	25.06.2013	2013	3	Belward and Skøien (2015)
KOMPSAT 5	Belward and Skøien (2015)	KOMPSAT	Korea	22.08.2013	2013	unknown
Dubaisat-2	Belward and Skøien (2015)	Dubaisat	UAE	21.11.2013	2013	4	Belward and Skøien (2015)
STSAT-3	Belward and Skøien (2015)	STSAT	Korea	21.11.2013	2013	27	Belward and Skøien (2015)
Skysat 1	Belward and Skøien (2015)	SyBox	USA	21.11.2013	2013	1	Belward and Skøien (2015)
Dove 3	Belward and Skøien (2015)	Planet Labs, Inc.	USA	21.11.2013	2013	3.7	Planet Labs, Inc
Dove 4	Belward and Skøien (2015)	Planet Labs, Inc.	USA	21.11.2013	2013	3.7	Planet Labs, Inc
SWARM-A	UCS Satellite Database (https://www.ucsusa.org/nuclear-weapons/space-weapons/satellite-database; accessed May 18, 2018)	Astrium	ESA	22.11.2013	2013	unknown
SWARM-B	UCS Satellite Database (https://www.ucsusa.org/nuclear-weapons/space-weapons/satellite-database; accessed May 18, 2018)	Astrium	ESA	22.11.2013	2013	unknown
SWARM-C	UCS Satellite Database (https://www.ucsusa.org/nuclear-weapons/space-weapons/satellite-database; accessed May 18, 2018)	Astrium	ESA	22.11.2013	2013	unknown
Shiyan 5 (SY5, Experimental Satellite 5)	UCS Satellite Database (https://www.ucsusa.org/nuclear-weapons/space-weapons/satellite-database; accessed May 18, 2018)	Chinese Academy of Space Technology (CAST)	China	25.11.2013	2013	unknown
Flock 1-1	Planet Labs, Inc.	Planet Labs, Inc.	USA	09.01.2014	2014	3.7	Planet Labs, Inc
Flock 1-2	Planet Labs, Inc.	Planet Labs, Inc.	USA	09.01.2014	2014	3.7	Planet Labs, Inc
Flock 1-3	Planet Labs, Inc.	Planet Labs, Inc.	USA	09.01.2014	2014	3.7	Planet Labs, Inc
Flock 1-4	Planet Labs, Inc.	Planet Labs, Inc.	USA	09.01.2014	2014	3.7	Planet Labs, Inc
Flock 1-5	Planet Labs, Inc.	Planet Labs, Inc.	USA	09.01.2014	2014	3.7	Planet Labs, Inc
Flock 1-6	Planet Labs, Inc.	Planet Labs, Inc.	USA	09.01.2014	2014	3.7	Planet Labs, Inc
Flock 1-7	Planet Labs, Inc.	Planet Labs, Inc.	USA	09.01.2014	2014	3.7	Planet Labs, Inc
Flock 1-8	Planet Labs, Inc.	Planet Labs, Inc.	USA	09.01.2014	2014	3.7	Planet Labs, Inc
Flock 1-9	Planet Labs, Inc.	Planet Labs, Inc.	USA	09.01.2014	2014	3.7	Planet Labs, Inc
Flock 1-10	Planet Labs, Inc.	Planet Labs, Inc.	USA	09.01.2014	2014	3.7	Planet Labs, Inc
Flock 1-11	Planet Labs, Inc.	Planet Labs, Inc.	USA	09.01.2014	2014	3.7	Planet Labs, Inc
Flock 1-12	Planet Labs, Inc.	Planet Labs, Inc.	USA	09.01.2014	2014	3.7	Planet Labs, Inc
Flock 1-13	Planet Labs, Inc.	Planet Labs, Inc.	USA	09.01.2014	2014	3.7	Planet Labs, Inc
Flock 1-14	Planet Labs, Inc.	Planet Labs, Inc.	USA	09.01.2014	2014	3.7	Planet Labs, Inc
Flock 1-15	Planet Labs, Inc.	Planet Labs, Inc.	USA	09.01.2014	2014	3.7	Planet Labs, Inc
Flock 1-16	Planet Labs, Inc.	Planet Labs, Inc.	USA	09.01.2014	2014	3.7	Planet Labs, Inc
Flock 1-17	Planet Labs, Inc.	Planet Labs, Inc.	USA	09.01.2014	2014	3.7	Planet Labs, Inc
Flock 1-18	Planet Labs, Inc.	Planet Labs, Inc.	USA	09.01.2014	2014	3.7	Planet Labs, Inc
Flock 1-19	Planet Labs, Inc.	Planet Labs, Inc.	USA	09.01.2014	2014	3.7	Planet Labs, Inc
Flock 1-20	Planet Labs, Inc.	Planet Labs, Inc.	USA	09.01.2014	2014	3.7	Planet Labs, Inc
Flock 1-21	Planet Labs, Inc.	Planet Labs, Inc.	USA	09.01.2014	2014	3.7	Planet Labs, Inc
Flock 1-22	Planet Labs, Inc.	Planet Labs, Inc.	USA	09.01.2014	2014	3.7	Planet Labs, Inc
Flock 1-23	Planet Labs, Inc.	Planet Labs, Inc.	USA	09.01.2014	2014	3.7	Planet Labs, Inc
Flock 1-24	Planet Labs, Inc.	Planet Labs, Inc.	USA	09.01.2014	2014	3.7	Planet Labs, Inc
Flock 1-25	Planet Labs, Inc.	Planet Labs, Inc.	USA	09.01.2014	2014	3.7	Planet Labs, Inc
Flock 1-26	Planet Labs, Inc.	Planet Labs, Inc.	USA	09.01.2014	2014	3.7	Planet Labs, Inc
Flock 1-27	Planet Labs, Inc.	Planet Labs, Inc.	USA	09.01.2014	2014	3.7	Planet Labs, Inc
Flock 1-28	Planet Labs, Inc.	Planet Labs, Inc.	USA	09.01.2014	2014	3.7	Planet Labs, Inc
GPM Core Observatory (Global Precipitation Measurement)	UCS Satellite Database (https://www.ucsusa.org/nuclear-weapons/space-weapons/satellite-database; accessed May 18, 2018)	NASA/Goddard Space Flight Center	USA/Japan	22.02.2014	2014	unknown
Sentinel 1A	UCS Satellite Database (https://www.ucsusa.org/nuclear-weapons/space-weapons/satellite-database; accessed May 18, 2018)	Thales Alenia Space Italia	ESA	03.04.2014	2014	5	ESA (https://earth.esa.int/web/guest/missions/esa-operational-eo-missions/sentinel-1)
KazEOSat-1 (Kazcosmos Earth Observation Satellite)	UCS Satellite Database (https://www.ucsusa.org/nuclear-weapons/space-weapons/satellite-database; accessed May 18, 2018)	Airbus Defence and Space	Kazakhstan	30.04.2014	2014	6.5	EO Portal (https://earth.esa.int/web/eoportal/satellite-missions/k/kazeosat-1)
Rising-2	UCS Satellite Database (https://www.ucsusa.org/nuclear-weapons/space-weapons/satellite-database; accessed May 18, 2018)	Tohoku University/Hokkaido University	Japan	24.05.2014	2014	5	EO Portal (https://directory.eoportal.org/web/eoportal/satellite-missions/r/rising-2)
UNIFORM 1ÃŠÃŠ(UNiversity International FORmation Mission 1)	UCS Satellite Database (https://www.ucsusa.org/nuclear-weapons/space-weapons/satellite-database; accessed May 18, 2018)	Wakayama University and other Japanese universities	Japan	24.05.2014	2014	86	EO Portal (https://eoportal.org/web/eoportal/satellite-missions/content/-/article/uniform-1)
Daichi-2 (Advanced Land Observing Satellite-2, ALOS 2 2)	UCS Satellite Database (https://www.ucsusa.org/nuclear-weapons/space-weapons/satellite-database; accessed May 18, 2018)	Mitsubishi Electric	Japan	24.05.2014	2014	3	EO Portal (https://directory.eoportal.org/web/eoportal/satellite-missions/content/-/article/alos-2-1)
Flock 1C-1	Planet Labs, Inc.	Planet Labs, Inc.	USA	19.06.2014	2014	3.7	Planet Labs, Inc
Flock 1C-2	Planet Labs, Inc.	Planet Labs, Inc.	USA	19.06.2014	2014	3.7	Planet Labs, Inc
Flock 1C-3	Planet Labs, Inc.	Planet Labs, Inc.	USA	19.06.2014	2014	3.7	Planet Labs, Inc
Flock 1C-4	Planet Labs, Inc.	Planet Labs, Inc.	USA	19.06.2014	2014	3.7	Planet Labs, Inc
Flock 1C-5	Planet Labs, Inc.	Planet Labs, Inc.	USA	19.06.2014	2014	3.7	Planet Labs, Inc
Flock 1C-6	Planet Labs, Inc.	Planet Labs, Inc.	USA	19.06.2014	2014	3.7	Planet Labs, Inc
Flock 1C-7	Planet Labs, Inc.	Planet Labs, Inc.	USA	19.06.2014	2014	3.7	Planet Labs, Inc
Flock 1C-8	Planet Labs, Inc.	Planet Labs, Inc.	USA	19.06.2014	2014	3.7	Planet Labs, Inc
Flock 1C-9	Planet Labs, Inc.	Planet Labs, Inc.	USA	19.06.2014	2014	3.7	Planet Labs, Inc
Flock 1C-10	Planet Labs, Inc.	Planet Labs, Inc.	USA	19.06.2014	2014	3.7	Planet Labs, Inc
Flock 1C-11	Planet Labs, Inc.	Planet Labs, Inc.	USA	19.06.2014	2014	3.7	Planet Labs, Inc
TIGRISat	UCS Satellite Database (https://www.ucsusa.org/nuclear-weapons/space-weapons/satellite-database; accessed May 18, 2018)	La Sapienza University of Rome	Iraq	19.06.2014	2014	unknown
Deimos 2	UCS Satellite Database (https://www.ucsusa.org/nuclear-weapons/space-weapons/satellite-database; accessed May 18, 2018)	Deimos Imaging/DMC International Imaging (DMCII)	Spain	19.06.2014	2014	1	EO Portal (https://directory.eoportal.org/web/eoportal/satellite-missions/d/deimos-2)
KazEOSat-2 (kazcosmos Earth Observation Satellite)	UCS Satellite Database (https://www.ucsusa.org/nuclear-weapons/space-weapons/satellite-database; accessed May 18, 2018)	Kazcosmos	Kazakhstan	19.06.2014	2014	1	EO Portal (https://earth.esa.int/web/eoportal/satellite-missions/k/kazeosat-2)
Spot 7 (SystÂme Probatoire dÃ•Observation de la Terre)	UCS Satellite Database (https://www.ucsusa.org/nuclear-weapons/space-weapons/satellite-database; accessed May 18, 2018)	Spot Image	France/Belgium/Sweden	30.06.2014	2014	1.5	EO Portal (https://directory.eoportal.org/web/eoportal/satellite-missions/s/spot-6-7)
SkySat-2	UCS Satellite Database (https://www.ucsusa.org/nuclear-weapons/space-weapons/satellite-database; accessed May 18, 2018)	Terra Bella	USA	08.07.2014	2014	1	Spaceflight 101 (http://spaceflight101.com/spacecraft/skysat-2/)
Meteor-M N-2	UCS Satellite Database (https://www.ucsusa.org/nuclear-weapons/space-weapons/satellite-database; accessed May 18, 2018)	Russian Federal Service For Hydrometeorology and Environmental Monitoring (ROSHYDROMET)	Russia	08.07.2014	2014	50	EO Portal (https://directory.eoportal.org/web/eoportal/satellite-missions/m/meteor-m-2)
Relek (ICA-FC1)	UCS Satellite Database (https://www.ucsusa.org/nuclear-weapons/space-weapons/satellite-database; accessed May 18, 2018)	Skobeltsyn Institute of Nuclear Physics	Russia	08.07.2014	2014	unknown
Flock 1B-1	Planet Labs, Inc.	Planet Labs, Inc.	USA	13.07.2014	2014	3.7	Planet Labs, Inc
Flock 1B-2	Planet Labs, Inc.	Planet Labs, Inc.	USA	13.07.2014	2014	3.7	Planet Labs, Inc
Flock 1B-3	Planet Labs, Inc.	Planet Labs, Inc.	USA	13.07.2014	2014	3.7	Planet Labs, Inc
Flock 1B-4	Planet Labs, Inc.	Planet Labs, Inc.	USA	13.07.2014	2014	3.7	Planet Labs, Inc
Flock 1B-5	Planet Labs, Inc.	Planet Labs, Inc.	USA	13.07.2014	2014	3.7	Planet Labs, Inc
Flock 1B-6	Planet Labs, Inc.	Planet Labs, Inc.	USA	13.07.2014	2014	3.7	Planet Labs, Inc
Flock 1B-7	Planet Labs, Inc.	Planet Labs, Inc.	USA	13.07.2014	2014	3.7	Planet Labs, Inc
Flock 1B-8	Planet Labs, Inc.	Planet Labs, Inc.	USA	13.07.2014	2014	3.7	Planet Labs, Inc
Flock 1B-9	Planet Labs, Inc.	Planet Labs, Inc.	USA	13.07.2014	2014	3.7	Planet Labs, Inc
Flock 1B-10	Planet Labs, Inc.	Planet Labs, Inc.	USA	13.07.2014	2014	3.7	Planet Labs, Inc
Flock 1B-11	Planet Labs, Inc.	Planet Labs, Inc.	USA	13.07.2014	2014	3.7	Planet Labs, Inc
Flock 1B-12	Planet Labs, Inc.	Planet Labs, Inc.	USA	13.07.2014	2014	3.7	Planet Labs, Inc
Flock 1B-13	Planet Labs, Inc.	Planet Labs, Inc.	USA	13.07.2014	2014	3.7	Planet Labs, Inc
Flock 1B-14	Planet Labs, Inc.	Planet Labs, Inc.	USA	13.07.2014	2014	3.7	Planet Labs, Inc
Flock 1B-15	Planet Labs, Inc.	Planet Labs, Inc.	USA	13.07.2014	2014	3.7	Planet Labs, Inc
Flock 1B-16	Planet Labs, Inc.	Planet Labs, Inc.	USA	13.07.2014	2014	3.7	Planet Labs, Inc
Flock 1B-17	Planet Labs, Inc.	Planet Labs, Inc.	USA	13.07.2014	2014	3.7	Planet Labs, Inc
Flock 1B-18	Planet Labs, Inc.	Planet Labs, Inc.	USA	13.07.2014	2014	3.7	Planet Labs, Inc
Flock 1B-19	Planet Labs, Inc.	Planet Labs, Inc.	USA	13.07.2014	2014	3.7	Planet Labs, Inc
Flock 1B-20	Planet Labs, Inc.	Planet Labs, Inc.	USA	13.07.2014	2014	3.7	Planet Labs, Inc
Flock 1B-21	Planet Labs, Inc.	Planet Labs, Inc.	USA	13.07.2014	2014	3.7	Planet Labs, Inc
Flock 1B-22	Planet Labs, Inc.	Planet Labs, Inc.	USA	13.07.2014	2014	3.7	Planet Labs, Inc
Worldview 3	UCS Satellite Database (https://www.ucsusa.org/nuclear-weapons/space-weapons/satellite-database; accessed May 18, 2018)	DigitalGlobe Corporation	USA	13.08.2014	2014	0.3	DigitalGlobe (http://worldview3.digitalglobe.com/)
Gaofen 2	UCS Satellite Database (https://www.ucsusa.org/nuclear-weapons/space-weapons/satellite-database; accessed May 18, 2018)	Shanghai Academy of Spaceflight Technology (SAST)	China	19.08.2014	2014	0.8	EO Portal (https://directory.eoportal.org/web/eoportal/satellite-missions/g/gaofen-2)
Chuangxin 1-4 (Innovation 1-4)	UCS Satellite Database (https://www.ucsusa.org/nuclear-weapons/space-weapons/satellite-database; accessed May 18, 2018)	Chinese Academy of Sciences	China	04.09.2014	2014	unknown
Tiantuo-2	UCS Satellite Database (https://www.ucsusa.org/nuclear-weapons/space-weapons/satellite-database; accessed May 18, 2018)	National University of Defense Technology	China	08.09.2014	2014	unknown
Himawari 8	UCS Satellite Database (https://www.ucsusa.org/nuclear-weapons/space-weapons/satellite-database; accessed May 18, 2018)	Japan Meteorological Agency/Meteorological Satellite Center (MSC)	Japan	07.10.2014	2014	500	EO Portal (https://directory.eoportal.org/web/eoportal/satellite-missions/h/himawari-8-9)/Wiki (http://www.jma.go.jp/jma/jma-eng/satellite/news/himawari89/himawari89_leaflet.pdf)
Qsat-EOS (KYUshu SATellite - Earth Observation System)	UCS Satellite Database (https://www.ucsusa.org/nuclear-weapons/space-weapons/satellite-database; accessed May 18, 2018)	Kyushu University	Japan	06.11.2014	2014	5	EO Portal (https://earth.esa.int/web/eoportal/satellite-missions/q/qsat)
TSUBAME	UCS Satellite Database (https://www.ucsusa.org/nuclear-weapons/space-weapons/satellite-database; accessed May 18, 2018)	Tokyo Institute of Technology, Tokyo University of Science and JAXA	Japan	06.11.2014	2014	14	EO Portal (https://directory.eoportal.org/web/eoportal/satellite-missions/t/tsubame)
ASNARO 1 (Advanced Satellite with New system Architecture for Observation)	UCS Satellite Database (https://www.ucsusa.org/nuclear-weapons/space-weapons/satellite-database; accessed May 18, 2018)	Ministry of Economy, Trade and Industry	Japan	06.11.2014	2014	0.5	EO Portal (https://directory.eoportal.org/web/eoportal/satellite-missions/content/-/article/asnaro)
Hodoyoshi-1	UCS Satellite Database (https://www.ucsusa.org/nuclear-weapons/space-weapons/satellite-database; accessed May 18, 2018)	University of Tokyo and NESTRA	Japan	06.11.2014	2014	6.7	Eo Portal (https://directory.eoportal.org/web/eoportal/satellite-missions/h/hodoyoshi-1)
Kuaizhou-2 (KZ-2)	UCS Satellite Database (https://www.ucsusa.org/nuclear-weapons/space-weapons/satellite-database; accessed May 18, 2018)	National Academy of Sciences	China	21.11.2014	2014	1.2	Spaceflight 101 (http://www.spaceflight101.net/kuaizhou---kuaizhou-2-launch.html)
CBERS 4 (China-Brazil Earth Resources Satellite 4)	UCS Satellite Database (https://www.ucsusa.org/nuclear-weapons/space-weapons/satellite-database; accessed May 18, 2018)	China National Space Administration (China)/National Institute for Space Research (Brazil)	China/Brazil	07.12.2014	2014	5	n2yo (https://www.n2yo.com/satellite/?s=40336)
Resurs-P2	UCS Satellite Database (https://www.ucsusa.org/nuclear-weapons/space-weapons/satellite-database; accessed May 18, 2018)	Russian Federal Space Agency (Roskosmos)	Russia	26.12.2014	2014	1	Spaceflight Now (https://spaceflightnow.com/2014/12/26/soyuz-rocket-launches-with-russian-earth-observation-craft/)
Fengyun 2G (FY 2G)	UCS Satellite Database (https://www.ucsusa.org/nuclear-weapons/space-weapons/satellite-database; accessed May 18, 2018)	China Meteorological Administration	China	31.12.2014	2014	5	EO Portal (https://directory.eoportal.org/web/eoportal/satellite-missions/f/fy-2#eI2fK12d0Herb)
Flock 1D'-1	Planet Labs, Inc.	Planet Labs, Inc.	USA	10.01.2015	2015	3.7	Planet Labs, Inc
Flock 1D'-2	Planet Labs, Inc.	Planet Labs, Inc.	USA	10.01.2015	2015	3.7	Planet Labs, Inc
CP-10 (Exocube)	UCS Satellite Database (https://www.ucsusa.org/nuclear-weapons/space-weapons/satellite-database; accessed May 18, 2018)	California Polytechnic State University/NASA JPL	USA	31.01.2015	2015	unknown
IGS-9A (Information Gathering Satellite 9A, IGS Radar 5)	UCS Satellite Database (https://www.ucsusa.org/nuclear-weapons/space-weapons/satellite-database; accessed May 18, 2018)	Cabinet Satellite Intelligence Center (CSIC)	Japan	31.01.2015	2015	unknown
SMAP (Soil Moisture Active Passive Satellite)	UCS Satellite Database (https://www.ucsusa.org/nuclear-weapons/space-weapons/satellite-database; accessed May 18, 2018)	National Aeronautics and Space Administration (NASA)	USA	31.01.2015	2015	1000	Nasa (https://smap.jpl.nasa.gov/mission/description/)
Kompsat-3A (Arirang 3A, Korean Multipurpose Satellite-3A)	UCS Satellite Database (https://www.ucsusa.org/nuclear-weapons/space-weapons/satellite-database; accessed May 18, 2018)	Korea Aerospace Research Institute (KARI)	South Korea	25.03.2015	2015	0.5	EO Portal (https://directory.eoportal.org/web/eoportal/satellite-missions/content/-/article/kompsat-3a)
IGS-9B (Information Gathering Satellite 9B, IGS Optical 5)	UCS Satellite Database (https://www.ucsusa.org/nuclear-weapons/space-weapons/satellite-database; accessed May 18, 2018)	Cabinet Satellite Intelligence Center (CSIC)	Japan	26.03.2015	2015	0.5	Spaceflight 101 (http://www.spaceflight101.net/h-iia---igs-optical-5-launch-updates.html)
Flock 1E-1	Planet Labs, Inc.	Planet Labs, Inc.	USA	14.04.2015	2015	3.7	Planet Labs, Inc
Flock 1E-2	Planet Labs, Inc.	Planet Labs, Inc.	USA	14.04.2015	2015	3.7	Planet Labs, Inc
Flock 1E-3	Planet Labs, Inc.	Planet Labs, Inc.	USA	14.04.2015	2015	3.7	Planet Labs, Inc
Flock 1E-4	Planet Labs, Inc.	Planet Labs, Inc.	USA	14.04.2015	2015	3.7	Planet Labs, Inc
Flock 1E-5	Planet Labs, Inc.	Planet Labs, Inc.	USA	14.04.2015	2015	3.7	Planet Labs, Inc
Flock 1E-6	Planet Labs, Inc.	Planet Labs, Inc.	USA	14.04.2015	2015	3.7	Planet Labs, Inc
Flock 1E-7	Planet Labs, Inc.	Planet Labs, Inc.	USA	14.04.2015	2015	3.7	Planet Labs, Inc
Flock 1E-8	Planet Labs, Inc.	Planet Labs, Inc.	USA	14.04.2015	2015	3.7	Planet Labs, Inc
Flock 1E-9	Planet Labs, Inc.	Planet Labs, Inc.	USA	14.04.2015	2015	3.7	Planet Labs, Inc
Flock 1E-10	Planet Labs, Inc.	Planet Labs, Inc.	USA	14.04.2015	2015	3.7	Planet Labs, Inc
Flock 1E-11	Planet Labs, Inc.	Planet Labs, Inc.	USA	14.04.2015	2015	3.7	Planet Labs, Inc
Flock 1E-12	Planet Labs, Inc.	Planet Labs, Inc.	USA	14.04.2015	2015	3.7	Planet Labs, Inc
Flock 1E-13	Planet Labs, Inc.	Planet Labs, Inc.	USA	14.04.2015	2015	3.7	Planet Labs, Inc
Flock 1E-14	Planet Labs, Inc.	Planet Labs, Inc.	USA	14.04.2015	2015	3.7	Planet Labs, Inc
Sentinel 2A	UCS Satellite Database (https://www.ucsusa.org/nuclear-weapons/space-weapons/satellite-database; accessed May 18, 2018)	EUMETSAT	ESA	23.06.2015	2015	10	ESA (https://earth.esa.int/web/sentinel/user-guides/sentinel-2-msi/resolutions/spatial)
Gaofen 8	UCS Satellite Database (https://www.ucsusa.org/nuclear-weapons/space-weapons/satellite-database; accessed May 18, 2018)	Shanghai Academy of Spaceflight Technology (SAST)	China	26.06.2015	2015	unknown
DMC 3-1 (Disaster Monitoring Constellation)	UCS Satellite Database (https://www.ucsusa.org/nuclear-weapons/space-weapons/satellite-database; accessed May 18, 2018)	Surrey Satellite Technology Ltd.	United Kingdom	10.07.2015	2015	1	EO Portal (https://directory.eoportal.org/web/eoportal/satellite-missions/content/-/article/dmc3-2)
DMC 3-2 (Disaster Monitoring Constellation)	UCS Satellite Database (https://www.ucsusa.org/nuclear-weapons/space-weapons/satellite-database; accessed May 18, 2018)	Surrey Satellite Technology Ltd.	United Kingdom	10.07.2015	2015	1	EO Portal (https://directory.eoportal.org/web/eoportal/satellite-missions/content/-/article/dmc3-2)
DMC 3-3 (Disaster Monitoring Constellation)	UCS Satellite Database (https://www.ucsusa.org/nuclear-weapons/space-weapons/satellite-database; accessed May 18, 2018)	Surrey Satellite Technology Ltd.	United Kingdom	10.07.2015	2015	1	EO Portal (https://directory.eoportal.org/web/eoportal/satellite-missions/content/-/article/dmc3-2)
Flock 2E-1	Planet Labs, Inc.	Planet Labs, Inc.	USA	12.07.2015	2015	3.7	Planet Labs, Inc
Flock 2E-2	Planet Labs, Inc.	Planet Labs, Inc.	USA	12.07.2015	2015	3.7	Planet Labs, Inc
Flock 2E-3	Planet Labs, Inc.	Planet Labs, Inc.	USA	12.07.2015	2015	3.7	Planet Labs, Inc
Flock 2E-4	Planet Labs, Inc.	Planet Labs, Inc.	USA	12.07.2015	2015	3.7	Planet Labs, Inc
Flock 2E-5	Planet Labs, Inc.	Planet Labs, Inc.	USA	12.07.2015	2015	3.7	Planet Labs, Inc
Flock 2E-6	Planet Labs, Inc.	Planet Labs, Inc.	USA	12.07.2015	2015	3.7	Planet Labs, Inc
Flock 2E-7	Planet Labs, Inc.	Planet Labs, Inc.	USA	12.07.2015	2015	3.7	Planet Labs, Inc
Flock 2E-8	Planet Labs, Inc.	Planet Labs, Inc.	USA	12.07.2015	2015	3.7	Planet Labs, Inc
Flock 2E-9	Planet Labs, Inc.	Planet Labs, Inc.	USA	12.07.2015	2015	3.7	Planet Labs, Inc
Flock 2E-10	Planet Labs, Inc.	Planet Labs, Inc.	USA	12.07.2015	2015	3.7	Planet Labs, Inc
Flock 2E-11	Planet Labs, Inc.	Planet Labs, Inc.	USA	12.07.2015	2015	3.7	Planet Labs, Inc
Flock 2E-12	Planet Labs, Inc.	Planet Labs, Inc.	USA	12.07.2015	2015	3.7	Planet Labs, Inc
Meteosat 11 (MSG 4)	UCS Satellite Database (https://www.ucsusa.org/nuclear-weapons/space-weapons/satellite-database; accessed May 18, 2018)	EUMETSAT (European Organization for the Exploitation of Meteorological Satellites)	Multinational	15.07.2015	2015	1000	EO Portal (https://directory.eoportal.org/web/eoportal/satellite-missions/m/meteosat-second-generation)
Flock 2B-1	Planet Labs, Inc.	Planet Labs, Inc.	USA	19.08.2015	2015	3.7	Planet Labs, Inc
Flock 2B-2	Planet Labs, Inc.	Planet Labs, Inc.	USA	19.08.2015	2015	3.7	Planet Labs, Inc
Flock 2B-3	Planet Labs, Inc.	Planet Labs, Inc.	USA	19.08.2015	2015	3.7	Planet Labs, Inc
Flock 2B-4	Planet Labs, Inc.	Planet Labs, Inc.	USA	19.08.2015	2015	3.7	Planet Labs, Inc
Flock 2B-5	Planet Labs, Inc.	Planet Labs, Inc.	USA	19.08.2015	2015	3.7	Planet Labs, Inc
Flock 2B-6	Planet Labs, Inc.	Planet Labs, Inc.	USA	19.08.2015	2015	3.7	Planet Labs, Inc
Flock 2B-7	Planet Labs, Inc.	Planet Labs, Inc.	USA	19.08.2015	2015	3.7	Planet Labs, Inc
Flock 2B-8	Planet Labs, Inc.	Planet Labs, Inc.	USA	19.08.2015	2015	3.7	Planet Labs, Inc
Flock 2B-9	Planet Labs, Inc.	Planet Labs, Inc.	USA	19.08.2015	2015	3.7	Planet Labs, Inc
Flock 2B-10	Planet Labs, Inc.	Planet Labs, Inc.	USA	19.08.2015	2015	3.7	Planet Labs, Inc
Flock 2B-11	Planet Labs, Inc.	Planet Labs, Inc.	USA	19.08.2015	2015	3.7	Planet Labs, Inc
Flock 2B-12	Planet Labs, Inc.	Planet Labs, Inc.	USA	19.08.2015	2015	3.7	Planet Labs, Inc
Gaofen 9	UCS Satellite Database (https://www.ucsusa.org/nuclear-weapons/space-weapons/satellite-database; accessed May 18, 2018)	China Aerospace Science and Technology Corporation (CASTC)	China	14.09.2015	2015	1	Spaceflight Now (https://spaceflightnow.com/2015/09/14/china-conducts-two-space-launches-in-short-span/)
LAPAN A2	UCS Satellite Database (https://www.ucsusa.org/nuclear-weapons/space-weapons/satellite-database; accessed May 18, 2018)	Indonesian National Aeronautics and Space Agency (Lembaga Penerbangan dan Antariksa Nasional - LAPAN)	Indonesia	24.09.2015	2015	3.7	EO Portal (https://directory.eoportal.org/web/eoportal/satellite-missions/l/lapan-a2)
Jilin-1	UCS Satellite Database (https://www.ucsusa.org/nuclear-weapons/space-weapons/satellite-database; accessed May 18, 2018)	Changchun Institute of Optics	China	07.10.2015	2015	0.7	Chang Guang (http://www.charmingglobe.com/EWeb/product_view.aspx?id=25)
Lingqiao-A (Lingqiao Video A)	UCS Satellite Database (https://www.ucsusa.org/nuclear-weapons/space-weapons/satellite-database; accessed May 18, 2018)	Changchun Institute of Optics	China	07.10.2015	2015	1.3	Gunter's (http://space.skyrocket.de/doc_sdat/jilin-1-video-01.htm)
Lingqiao-B (Lingqiao Video B)	UCS Satellite Database (https://www.ucsusa.org/nuclear-weapons/space-weapons/satellite-database; accessed May 18, 2018)	Changchun Institute of Optics	China	07.10.2015	2015	1.3	Gunter's (http://space.skyrocket.de/doc_sdat/jilin-1-video-01.htm)
LQSat (Lingqiao Satellite, Jilian 1A)	UCS Satellite Database (https://www.ucsusa.org/nuclear-weapons/space-weapons/satellite-database; accessed May 18, 2018)	Changchun Institute of Optics	China	07.10.2015	2015	2	amsat-uk.org
BisonSat (Nwist Qwiqway)	UCS Satellite Database (https://www.ucsusa.org/nuclear-weapons/space-weapons/satellite-database; accessed May 18, 2018)	Salish Kootenai College	USA	08.10.2015	2015	43	Gunter's (http://space.skyrocket.de/doc_sdat/bisonsat.htm)
Tianhui 1-03	UCS Satellite Database (https://www.ucsusa.org/nuclear-weapons/space-weapons/satellite-database; accessed May 18, 2018)	China Aerospace Science and Technology Corporation (CASTC)	China	26.10.2015	2015	5	Gunter's (http://space.skyrocket.de/doc_sdat/th-1.htm)
Electro-L2	UCS Satellite Database (https://www.ucsusa.org/nuclear-weapons/space-weapons/satellite-database; accessed May 18, 2018)	Roshydromet - Planeta	Russia	11.12.2015	2015	1000	Russian Space Web (http://www.russianspaceweb.com/elektro-l2.html)
Kent Ridge 1	UCS Satellite Database (https://www.ucsusa.org/nuclear-weapons/space-weapons/satellite-database; accessed May 18, 2018)	National University of Singapore	Singapore	16.12.2015	2015	6	EO Portal (https://directory.eoportal.org/web/eoportal/satellite-missions/k/kent-ridge-1)
Galassia	UCS Satellite Database (https://www.ucsusa.org/nuclear-weapons/space-weapons/satellite-database; accessed May 18, 2018)	National University of Singapore	Singapore	16.12.2015	2015	unknown
TeLEOS 1	UCS Satellite Database (https://www.ucsusa.org/nuclear-weapons/space-weapons/satellite-database; accessed May 18, 2018)	AgilSpace	Singapore	16.12.2015	2015	1	EO Portal (https://directory.eoportal.org/web/eoportal/satellite-missions/t/teleos-1)
Gaofen 4	UCS Satellite Database (https://www.ucsusa.org/nuclear-weapons/space-weapons/satellite-database; accessed May 18, 2018)	China Aerospace Science and Technology Corporation (CASTC)	China	28.12.2015	2015	50	Gunter's (http://space.skyrocket.de/doc_sdat/gf-4.htm)
Jason 3	UCS Satellite Database (https://www.ucsusa.org/nuclear-weapons/space-weapons/satellite-database; accessed May 18, 2018)	NASA/Centre National d'Etudes Spatiales (CNES)/NOAA/EUMETSAT	USA/France	17.01.2016	2016	unknown
Sentinel 3A	UCS Satellite Database (https://www.ucsusa.org/nuclear-weapons/space-weapons/satellite-database; accessed May 18, 2018)	EUMETSAT	ESA	16.02.2016	2016	300	ESA (https://sentinel.esa.int/web/sentinel/user-guides/sentinel-3-olci/resolutions)
Resurs-P3	UCS Satellite Database (https://www.ucsusa.org/nuclear-weapons/space-weapons/satellite-database; accessed May 18, 2018)	Russian Federal Space Agency (Roskosmos)	Russia	13.03.2016	2016	1	Spaceflight Now (https://spaceflightnow.com/2016/03/13/russian-earth-observing-satellite-delivered-to-orbit/)
Flock 2E'-1	Planet Labs, Inc.	Planet Labs, Inc.	USA	22.03.2016	2016	3.7	Planet Labs, Inc
Flock 2E'-2	Planet Labs, Inc.	Planet Labs, Inc.	USA	22.03.2016	2016	3.7	Planet Labs, Inc
Flock 2E'-3	Planet Labs, Inc.	Planet Labs, Inc.	USA	22.03.2016	2016	3.7	Planet Labs, Inc
Flock 2E'-4	Planet Labs, Inc.	Planet Labs, Inc.	USA	22.03.2016	2016	3.7	Planet Labs, Inc
Flock 2E'-5	Planet Labs, Inc.	Planet Labs, Inc.	USA	22.03.2016	2016	3.7	Planet Labs, Inc
Flock 2E'-6	Planet Labs, Inc.	Planet Labs, Inc.	USA	22.03.2016	2016	3.7	Planet Labs, Inc
Flock 2E'-7	Planet Labs, Inc.	Planet Labs, Inc.	USA	22.03.2016	2016	3.7	Planet Labs, Inc
Flock 2E'-8	Planet Labs, Inc.	Planet Labs, Inc.	USA	22.03.2016	2016	3.7	Planet Labs, Inc
Flock 2E'-9	Planet Labs, Inc.	Planet Labs, Inc.	USA	22.03.2016	2016	3.7	Planet Labs, Inc
Flock 2E'-10	Planet Labs, Inc.	Planet Labs, Inc.	USA	22.03.2016	2016	3.7	Planet Labs, Inc
Flock 2E'-11	Planet Labs, Inc.	Planet Labs, Inc.	USA	22.03.2016	2016	3.7	Planet Labs, Inc
Flock 2E'-12	Planet Labs, Inc.	Planet Labs, Inc.	USA	22.03.2016	2016	3.7	Planet Labs, Inc
Flock 2E'-13	Planet Labs, Inc.	Planet Labs, Inc.	USA	22.03.2016	2016	3.7	Planet Labs, Inc
Flock 2E'-14	Planet Labs, Inc.	Planet Labs, Inc.	USA	22.03.2016	2016	3.7	Planet Labs, Inc
Flock 2E'-15	Planet Labs, Inc.	Planet Labs, Inc.	USA	22.03.2016	2016	3.7	Planet Labs, Inc
Flock 2E'-16	Planet Labs, Inc.	Planet Labs, Inc.	USA	22.03.2016	2016	3.7	Planet Labs, Inc
Flock 2E'-17	Planet Labs, Inc.	Planet Labs, Inc.	USA	22.03.2016	2016	3.7	Planet Labs, Inc
Flock 2E'-18	Planet Labs, Inc.	Planet Labs, Inc.	USA	22.03.2016	2016	3.7	Planet Labs, Inc
Flock 2E'-19	Planet Labs, Inc.	Planet Labs, Inc.	USA	22.03.2016	2016	3.7	Planet Labs, Inc
Flock 2E'-20	Planet Labs, Inc.	Planet Labs, Inc.	USA	22.03.2016	2016	3.7	Planet Labs, Inc
Sentinel 1B	UCS Satellite Database (https://www.ucsusa.org/nuclear-weapons/space-weapons/satellite-database; accessed May 18, 2018)	EUMETSAT	ESA	25.04.2016	2016	5	ESA (https://earth.esa.int/web/guest/missions/esa-operational-eo-missions/sentinel-1)
â€žuSat-1 (Fresco)	UCS Satellite Database (https://www.ucsusa.org/nuclear-weapons/space-weapons/satellite-database; accessed May 18, 2018)	Satellogic	Argentina	29.05.2016	2016	1	Gunter's (http://space.skyrocket.de/doc_sdat/nusat-1.htm)
â€žuSat-2 (Batata)	UCS Satellite Database (https://www.ucsusa.org/nuclear-weapons/space-weapons/satellite-database; accessed May 18, 2018)	Satellogic	Argentina	29.05.2016	2016	1	Gunter's (http://space.skyrocket.de/doc_sdat/nusat-1.htm)
Ziyuan 3-2	UCS Satellite Database (https://www.ucsusa.org/nuclear-weapons/space-weapons/satellite-database; accessed May 18, 2018)	China Centre for Resources Satellite Data and Application (CRESDA)	China	29.05.2016	2016	2.1	NASA Space Flight (https://www.nasaspaceflight.com/2016/05/chinese-long-march-4b-ziyuan-aleph/)
Flock 2P-1	Planet Labs, Inc.	Planet Labs, Inc.	USA	21.06.2016	2016	3.7	Planet Labs, Inc
Flock 2P-2	Planet Labs, Inc.	Planet Labs, Inc.	USA	21.06.2016	2016	3.7	Planet Labs, Inc
Flock 2P-3	Planet Labs, Inc.	Planet Labs, Inc.	USA	21.06.2016	2016	3.7	Planet Labs, Inc
Flock 2P-4	Planet Labs, Inc.	Planet Labs, Inc.	USA	21.06.2016	2016	3.7	Planet Labs, Inc
Flock 2P-5	Planet Labs, Inc.	Planet Labs, Inc.	USA	21.06.2016	2016	3.7	Planet Labs, Inc
Flock 2P-6	Planet Labs, Inc.	Planet Labs, Inc.	USA	21.06.2016	2016	3.7	Planet Labs, Inc
Flock 2P-7	Planet Labs, Inc.	Planet Labs, Inc.	USA	21.06.2016	2016	3.7	Planet Labs, Inc
Flock 2P-8	Planet Labs, Inc.	Planet Labs, Inc.	USA	21.06.2016	2016	3.7	Planet Labs, Inc
Flock 2P-9	Planet Labs, Inc.	Planet Labs, Inc.	USA	21.06.2016	2016	3.7	Planet Labs, Inc
Flock 2P-10	Planet Labs, Inc.	Planet Labs, Inc.	USA	21.06.2016	2016	3.7	Planet Labs, Inc
Flock 2P-11	Planet Labs, Inc.	Planet Labs, Inc.	USA	21.06.2016	2016	3.7	Planet Labs, Inc
Flock 2P-12	Planet Labs, Inc.	Planet Labs, Inc.	USA	21.06.2016	2016	3.7	Planet Labs, Inc
SkySat-3 (SkySat Gen 2-1)	UCS Satellite Database (https://www.ucsusa.org/nuclear-weapons/space-weapons/satellite-database; accessed May 18, 2018)	Terra Bella	USA	22.06.2016	2016	1	Planet Labs, Inc
GHGSat-D (Greenhouse Gas Satellite - Demonstrator, Claire)	UCS Satellite Database (https://www.ucsusa.org/nuclear-weapons/space-weapons/satellite-database; accessed May 18, 2018)	GHGSat, Inc.	Canada	22.06.2016	2016	50	EOS (https://directory.eoportal.org/web/eoportal/satellite-missions/g/ghgsat-d)
BIROS (Bispectral Infrared Optical System)	UCS Satellite Database (https://www.ucsusa.org/nuclear-weapons/space-weapons/satellite-database; accessed May 18, 2018)	German Aerospace Center (DLR)	Germany	22.06.2016	2016	42.4	EOS (https://directory.eoportal.org/web/eoportal/satellite-missions/content/-/article/biros)
CartoSat 2C	UCS Satellite Database (https://www.ucsusa.org/nuclear-weapons/space-weapons/satellite-database; accessed May 18, 2018)	Indian Space Research Organization (ISRO)	India	22.06.2016	2016	0.6	http://www.thehindu.com/todays-paper/tp-national/2016-set-to-lift-isro-towards-heavy-missions/article8032709.ece
SkySat-4	Planet Labs, Inc.	Terra Bella	USA	16.09.2016	2016	0.8	Planet Labs, Inc
SkySat-5	Planet Labs, Inc.	Terra Bella	USA	16.09.2016	2016	0.8	Planet Labs, Inc
SkySat-6	Planet Labs, Inc.	Terra Bella	USA	16.09.2016	2016	0.8	Planet Labs, Inc
SkySat-7	Planet Labs, Inc.	Terra Bella	USA	16.09.2016	2016	0.8	Planet Labs, Inc
WorldView 4	UCS Satellite Database (https://www.ucsusa.org/nuclear-weapons/space-weapons/satellite-database; accessed May 18, 2018)	DigitalGlobe Corporation	USA	11.11.2016	2016	0.3	DigitalGlobe (http://worldview4.digitalglobe.com/)
JL-1	SpaceFlightNow Launch Log (https://spaceflightnow.com/launch-log/; accessed May 17, 2018)	Chang Guang Satellite Tech. Co	China	08.01.2017	2017	1	Space Flight Now (https://spaceflightnow.com/2017/01/09/kuaizhou-rocket-lifts-off-on-first-commercial-mission/)
Flock 3P-1	Planet Labs, Inc.	Planet Labs, Inc.	USA	14.02.2017	2017	3.7	Planet Labs, Inc
Flock 3P-2	Planet Labs, Inc.	Planet Labs, Inc.	USA	14.02.2017	2017	3.7	Planet Labs, Inc
Flock 3P-3	Planet Labs, Inc.	Planet Labs, Inc.	USA	14.02.2017	2017	3.7	Planet Labs, Inc
Flock 3P-4	Planet Labs, Inc.	Planet Labs, Inc.	USA	14.02.2017	2017	3.7	Planet Labs, Inc
Flock 3P-5	Planet Labs, Inc.	Planet Labs, Inc.	USA	14.02.2017	2017	3.7	Planet Labs, Inc
Flock 3P-6	Planet Labs, Inc.	Planet Labs, Inc.	USA	14.02.2017	2017	3.7	Planet Labs, Inc
Flock 3P-7	Planet Labs, Inc.	Planet Labs, Inc.	USA	14.02.2017	2017	3.7	Planet Labs, Inc
Flock 3P-8	Planet Labs, Inc.	Planet Labs, Inc.	USA	14.02.2017	2017	3.7	Planet Labs, Inc
Flock 3P-9	Planet Labs, Inc.	Planet Labs, Inc.	USA	14.02.2017	2017	3.7	Planet Labs, Inc
Flock 3P-10	Planet Labs, Inc.	Planet Labs, Inc.	USA	14.02.2017	2017	3.7	Planet Labs, Inc
Flock 3P-11	Planet Labs, Inc.	Planet Labs, Inc.	USA	14.02.2017	2017	3.7	Planet Labs, Inc
Flock 3P-12	Planet Labs, Inc.	Planet Labs, Inc.	USA	14.02.2017	2017	3.7	Planet Labs, Inc
Flock 3P-13	Planet Labs, Inc.	Planet Labs, Inc.	USA	14.02.2017	2017	3.7	Planet Labs, Inc
Flock 3P-14	Planet Labs, Inc.	Planet Labs, Inc.	USA	14.02.2017	2017	3.7	Planet Labs, Inc
Flock 3P-15	Planet Labs, Inc.	Planet Labs, Inc.	USA	14.02.2017	2017	3.7	Planet Labs, Inc
Flock 3P-16	Planet Labs, Inc.	Planet Labs, Inc.	USA	14.02.2017	2017	3.7	Planet Labs, Inc
Flock 3P-17	Planet Labs, Inc.	Planet Labs, Inc.	USA	14.02.2017	2017	3.7	Planet Labs, Inc
Flock 3P-18	Planet Labs, Inc.	Planet Labs, Inc.	USA	14.02.2017	2017	3.7	Planet Labs, Inc
Flock 3P-19	Planet Labs, Inc.	Planet Labs, Inc.	USA	14.02.2017	2017	3.7	Planet Labs, Inc
Flock 3P-20	Planet Labs, Inc.	Planet Labs, Inc.	USA	14.02.2017	2017	3.7	Planet Labs, Inc
Flock 3P-21	Planet Labs, Inc.	Planet Labs, Inc.	USA	14.02.2017	2017	3.7	Planet Labs, Inc
Flock 3P-22	Planet Labs, Inc.	Planet Labs, Inc.	USA	14.02.2017	2017	3.7	Planet Labs, Inc
Flock 3P-23	Planet Labs, Inc.	Planet Labs, Inc.	USA	14.02.2017	2017	3.7	Planet Labs, Inc
Flock 3P-24	Planet Labs, Inc.	Planet Labs, Inc.	USA	14.02.2017	2017	3.7	Planet Labs, Inc
Flock 3P-25	Planet Labs, Inc.	Planet Labs, Inc.	USA	14.02.2017	2017	3.7	Planet Labs, Inc
Flock 3P-26	Planet Labs, Inc.	Planet Labs, Inc.	USA	14.02.2017	2017	3.7	Planet Labs, Inc
Flock 3P-27	Planet Labs, Inc.	Planet Labs, Inc.	USA	14.02.2017	2017	3.7	Planet Labs, Inc
Flock 3P-28	Planet Labs, Inc.	Planet Labs, Inc.	USA	14.02.2017	2017	3.7	Planet Labs, Inc
Flock 3P-29	Planet Labs, Inc.	Planet Labs, Inc.	USA	14.02.2017	2017	3.7	Planet Labs, Inc
Flock 3P-30	Planet Labs, Inc.	Planet Labs, Inc.	USA	14.02.2017	2017	3.7	Planet Labs, Inc
Flock 3P-31	Planet Labs, Inc.	Planet Labs, Inc.	USA	14.02.2017	2017	3.7	Planet Labs, Inc
Flock 3P-32	Planet Labs, Inc.	Planet Labs, Inc.	USA	14.02.2017	2017	3.7	Planet Labs, Inc
Flock 3P-33	Planet Labs, Inc.	Planet Labs, Inc.	USA	14.02.2017	2017	3.7	Planet Labs, Inc
Flock 3P-34	Planet Labs, Inc.	Planet Labs, Inc.	USA	14.02.2017	2017	3.7	Planet Labs, Inc
Flock 3P-35	Planet Labs, Inc.	Planet Labs, Inc.	USA	14.02.2017	2017	3.7	Planet Labs, Inc
Flock 3P-36	Planet Labs, Inc.	Planet Labs, Inc.	USA	14.02.2017	2017	3.7	Planet Labs, Inc
Flock 3P-37	Planet Labs, Inc.	Planet Labs, Inc.	USA	14.02.2017	2017	3.7	Planet Labs, Inc
Flock 3P-38	Planet Labs, Inc.	Planet Labs, Inc.	USA	14.02.2017	2017	3.7	Planet Labs, Inc
Flock 3P-39	Planet Labs, Inc.	Planet Labs, Inc.	USA	14.02.2017	2017	3.7	Planet Labs, Inc
Flock 3P-40	Planet Labs, Inc.	Planet Labs, Inc.	USA	14.02.2017	2017	3.7	Planet Labs, Inc
Flock 3P-41	Planet Labs, Inc.	Planet Labs, Inc.	USA	14.02.2017	2017	3.7	Planet Labs, Inc
Flock 3P-42	Planet Labs, Inc.	Planet Labs, Inc.	USA	14.02.2017	2017	3.7	Planet Labs, Inc
Flock 3P-43	Planet Labs, Inc.	Planet Labs, Inc.	USA	14.02.2017	2017	3.7	Planet Labs, Inc
Flock 3P-44	Planet Labs, Inc.	Planet Labs, Inc.	USA	14.02.2017	2017	3.7	Planet Labs, Inc
Flock 3P-45	Planet Labs, Inc.	Planet Labs, Inc.	USA	14.02.2017	2017	3.7	Planet Labs, Inc
Flock 3P-46	Planet Labs, Inc.	Planet Labs, Inc.	USA	14.02.2017	2017	3.7	Planet Labs, Inc
Flock 3P-47	Planet Labs, Inc.	Planet Labs, Inc.	USA	14.02.2017	2017	3.7	Planet Labs, Inc
Flock 3P-48	Planet Labs, Inc.	Planet Labs, Inc.	USA	14.02.2017	2017	3.7	Planet Labs, Inc
Flock 3P-49	Planet Labs, Inc.	Planet Labs, Inc.	USA	14.02.2017	2017	3.7	Planet Labs, Inc
Flock 3P-50	Planet Labs, Inc.	Planet Labs, Inc.	USA	14.02.2017	2017	3.7	Planet Labs, Inc
Flock 3P-51	Planet Labs, Inc.	Planet Labs, Inc.	USA	14.02.2017	2017	3.7	Planet Labs, Inc
Flock 3P-52	Planet Labs, Inc.	Planet Labs, Inc.	USA	14.02.2017	2017	3.7	Planet Labs, Inc
Flock 3P-53	Planet Labs, Inc.	Planet Labs, Inc.	USA	14.02.2017	2017	3.7	Planet Labs, Inc
Flock 3P-54	Planet Labs, Inc.	Planet Labs, Inc.	USA	14.02.2017	2017	3.7	Planet Labs, Inc
Flock 3P-55	Planet Labs, Inc.	Planet Labs, Inc.	USA	14.02.2017	2017	3.7	Planet Labs, Inc
Flock 3P-56	Planet Labs, Inc.	Planet Labs, Inc.	USA	14.02.2017	2017	3.7	Planet Labs, Inc
Flock 3P-57	Planet Labs, Inc.	Planet Labs, Inc.	USA	14.02.2017	2017	3.7	Planet Labs, Inc
Flock 3P-58	Planet Labs, Inc.	Planet Labs, Inc.	USA	14.02.2017	2017	3.7	Planet Labs, Inc
Flock 3P-59	Planet Labs, Inc.	Planet Labs, Inc.	USA	14.02.2017	2017	3.7	Planet Labs, Inc
Flock 3P-60	Planet Labs, Inc.	Planet Labs, Inc.	USA	14.02.2017	2017	3.7	Planet Labs, Inc
Flock 3P-61	Planet Labs, Inc.	Planet Labs, Inc.	USA	14.02.2017	2017	3.7	Planet Labs, Inc
Flock 3P-62	Planet Labs, Inc.	Planet Labs, Inc.	USA	14.02.2017	2017	3.7	Planet Labs, Inc
Flock 3P-63	Planet Labs, Inc.	Planet Labs, Inc.	USA	14.02.2017	2017	3.7	Planet Labs, Inc
Flock 3P-64	Planet Labs, Inc.	Planet Labs, Inc.	USA	14.02.2017	2017	3.7	Planet Labs, Inc
Flock 3P-65	Planet Labs, Inc.	Planet Labs, Inc.	USA	14.02.2017	2017	3.7	Planet Labs, Inc
Flock 3P-66	Planet Labs, Inc.	Planet Labs, Inc.	USA	14.02.2017	2017	3.7	Planet Labs, Inc
Flock 3P-67	Planet Labs, Inc.	Planet Labs, Inc.	USA	14.02.2017	2017	3.7	Planet Labs, Inc
Flock 3P-68	Planet Labs, Inc.	Planet Labs, Inc.	USA	14.02.2017	2017	3.7	Planet Labs, Inc
Flock 3P-69	Planet Labs, Inc.	Planet Labs, Inc.	USA	14.02.2017	2017	3.7	Planet Labs, Inc
Flock 3P-70	Planet Labs, Inc.	Planet Labs, Inc.	USA	14.02.2017	2017	3.7	Planet Labs, Inc
Flock 3P-71	Planet Labs, Inc.	Planet Labs, Inc.	USA	14.02.2017	2017	3.7	Planet Labs, Inc
Flock 3P-72	Planet Labs, Inc.	Planet Labs, Inc.	USA	14.02.2017	2017	3.7	Planet Labs, Inc
Flock 3P-73	Planet Labs, Inc.	Planet Labs, Inc.	USA	14.02.2017	2017	3.7	Planet Labs, Inc
Flock 3P-74	Planet Labs, Inc.	Planet Labs, Inc.	USA	14.02.2017	2017	3.7	Planet Labs, Inc
Flock 3P-75	Planet Labs, Inc.	Planet Labs, Inc.	USA	14.02.2017	2017	3.7	Planet Labs, Inc
Flock 3P-76	Planet Labs, Inc.	Planet Labs, Inc.	USA	14.02.2017	2017	3.7	Planet Labs, Inc
Flock 3P-77	Planet Labs, Inc.	Planet Labs, Inc.	USA	14.02.2017	2017	3.7	Planet Labs, Inc
Flock 3P-78	Planet Labs, Inc.	Planet Labs, Inc.	USA	14.02.2017	2017	3.7	Planet Labs, Inc
Flock 3P-79	Planet Labs, Inc.	Planet Labs, Inc.	USA	14.02.2017	2017	3.7	Planet Labs, Inc
Flock 3P-80	Planet Labs, Inc.	Planet Labs, Inc.	USA	14.02.2017	2017	3.7	Planet Labs, Inc
Flock 3P-81	Planet Labs, Inc.	Planet Labs, Inc.	USA	14.02.2017	2017	3.7	Planet Labs, Inc
Flock 3P-82	Planet Labs, Inc.	Planet Labs, Inc.	USA	14.02.2017	2017	3.7	Planet Labs, Inc
Flock 3P-83	Planet Labs, Inc.	Planet Labs, Inc.	USA	14.02.2017	2017	3.7	Planet Labs, Inc
Flock 3P-84	Planet Labs, Inc.	Planet Labs, Inc.	USA	14.02.2017	2017	3.7	Planet Labs, Inc
Flock 3P-85	Planet Labs, Inc.	Planet Labs, Inc.	USA	14.02.2017	2017	3.7	Planet Labs, Inc
Flock 3P-86	Planet Labs, Inc.	Planet Labs, Inc.	USA	14.02.2017	2017	3.7	Planet Labs, Inc
Flock 3P-87	Planet Labs, Inc.	Planet Labs, Inc.	USA	14.02.2017	2017	3.7	Planet Labs, Inc
Flock 3P-88	Planet Labs, Inc.	Planet Labs, Inc.	USA	14.02.2017	2017	3.7	Planet Labs, Inc
Cartosat 2D	SpaceFlightNow Launch Log (https://spaceflightnow.com/launch-log/; accessed May 17, 2018)	Indian Space Research Organization (ISRO)	India	14.02.2017	2017	2	EO Portal (https://directory.eoportal.org/web/eoportal/satellite-missions/c-missions/cartosat-2d)
Sentinel 2B	SpaceFlightNow Launch Log (https://spaceflightnow.com/launch-log/; accessed May 17, 2018)	EUMETSAT/Copernicus	ESA	06.03.2017	2017	10	ESA (http://www.esa.int/Our_Activities/Observing_the_Earth/Copernicus/Sentinel-2/Data_products)
Sentinel 2A	SpaceFlightNow Launch Log (https://spaceflightnow.com/launch-log/; accessed May 17, 2018)	EUMETSAT	ESA	07.03.2017	2017	10	ESA (http://www.esa.int/Our_Activities/Observing_the_Earth/Copernicus/Sentinel-2/Data_products)
Cartosat 2E	SpaceFlightNow Launch Log (https://spaceflightnow.com/launch-log/; accessed May 17, 2018)	Indian Space Research Organization (ISRO)	India	22.06.2017	2017	2	EO Portal (https://directory.eoportal.org/web/eoportal/satellite-missions/c-missions/cartosat-2e)
NIUSAT	SpaceFlightNow Launch Log (https://spaceflightnow.com/launch-log/; accessed May 17, 2018)	Noorul Islam University	India	22.06.2017	2017	30	ISRO (https://www.isac.gov.in/student-satellites/html/niusat.jsp)
CE-SAT 1	SpaceFlightNow Launch Log (https://spaceflightnow.com/launch-log/; accessed May 17, 2018)	Canon Electronics	Japan	22.06.2017	2017	1	Gunter's Space Page (http://space.skyrocket.de/doc_sdat/ce-sat-1.htm)
Flock 2K-1	Planet Labs, Inc.	Planet Labs, Inc.	USA	14.07.2017	2017	3.7	Planet Labs, Inc
Flock 2K-2	Planet Labs, Inc.	Planet Labs, Inc.	USA	14.07.2017	2017	3.7	Planet Labs, Inc
Flock 2K-3	Planet Labs, Inc.	Planet Labs, Inc.	USA	14.07.2017	2017	3.7	Planet Labs, Inc
Flock 2K-4	Planet Labs, Inc.	Planet Labs, Inc.	USA	14.07.2017	2017	3.7	Planet Labs, Inc
Flock 2K-5	Planet Labs, Inc.	Planet Labs, Inc.	USA	14.07.2017	2017	3.7	Planet Labs, Inc
Flock 2K-6	Planet Labs, Inc.	Planet Labs, Inc.	USA	14.07.2017	2017	3.7	Planet Labs, Inc
Flock 2K-7	Planet Labs, Inc.	Planet Labs, Inc.	USA	14.07.2017	2017	3.7	Planet Labs, Inc
Flock 2K-8	Planet Labs, Inc.	Planet Labs, Inc.	USA	14.07.2017	2017	3.7	Planet Labs, Inc
Flock 2K-9	Planet Labs, Inc.	Planet Labs, Inc.	USA	14.07.2017	2017	3.7	Planet Labs, Inc
Flock 2K-10	Planet Labs, Inc.	Planet Labs, Inc.	USA	14.07.2017	2017	3.7	Planet Labs, Inc
Flock 2K-11	Planet Labs, Inc.	Planet Labs, Inc.	USA	14.07.2017	2017	3.7	Planet Labs, Inc
Flock 2K-12	Planet Labs, Inc.	Planet Labs, Inc.	USA	14.07.2017	2017	3.7	Planet Labs, Inc
Flock 2K-13	Planet Labs, Inc.	Planet Labs, Inc.	USA	14.07.2017	2017	3.7	Planet Labs, Inc
Flock 2K-14	Planet Labs, Inc.	Planet Labs, Inc.	USA	14.07.2017	2017	3.7	Planet Labs, Inc
Flock 2K-15	Planet Labs, Inc.	Planet Labs, Inc.	USA	14.07.2017	2017	3.7	Planet Labs, Inc
Flock 2K-16	Planet Labs, Inc.	Planet Labs, Inc.	USA	14.07.2017	2017	3.7	Planet Labs, Inc
Flock 2K-17	Planet Labs, Inc.	Planet Labs, Inc.	USA	14.07.2017	2017	3.7	Planet Labs, Inc
Flock 2K-18	Planet Labs, Inc.	Planet Labs, Inc.	USA	14.07.2017	2017	3.7	Planet Labs, Inc
Flock 2K-19	Planet Labs, Inc.	Planet Labs, Inc.	USA	14.07.2017	2017	3.7	Planet Labs, Inc
Flock 2K-20	Planet Labs, Inc.	Planet Labs, Inc.	USA	14.07.2017	2017	3.7	Planet Labs, Inc
Flock 2K-21	Planet Labs, Inc.	Planet Labs, Inc.	USA	14.07.2017	2017	3.7	Planet Labs, Inc
Flock 2K-22	Planet Labs, Inc.	Planet Labs, Inc.	USA	14.07.2017	2017	3.7	Planet Labs, Inc
Flock 2K-23	Planet Labs, Inc.	Planet Labs, Inc.	USA	14.07.2017	2017	3.7	Planet Labs, Inc
Flock 2K-24	Planet Labs, Inc.	Planet Labs, Inc.	USA	14.07.2017	2017	3.7	Planet Labs, Inc
Flock 2K-25	Planet Labs, Inc.	Planet Labs, Inc.	USA	14.07.2017	2017	3.7	Planet Labs, Inc
Flock 2K-26	Planet Labs, Inc.	Planet Labs, Inc.	USA	14.07.2017	2017	3.7	Planet Labs, Inc
Flock 2K-27	Planet Labs, Inc.	Planet Labs, Inc.	USA	14.07.2017	2017	3.7	Planet Labs, Inc
Flock 2K-28	Planet Labs, Inc.	Planet Labs, Inc.	USA	14.07.2017	2017	3.7	Planet Labs, Inc
Flock 2K-29	Planet Labs, Inc.	Planet Labs, Inc.	USA	14.07.2017	2017	3.7	Planet Labs, Inc
Flock 2K-30	Planet Labs, Inc.	Planet Labs, Inc.	USA	14.07.2017	2017	3.7	Planet Labs, Inc
Flock 2K-31	Planet Labs, Inc.	Planet Labs, Inc.	USA	14.07.2017	2017	3.7	Planet Labs, Inc
Flock 2K-32	Planet Labs, Inc.	Planet Labs, Inc.	USA	14.07.2017	2017	3.7	Planet Labs, Inc
Flock 2K-33	Planet Labs, Inc.	Planet Labs, Inc.	USA	14.07.2017	2017	3.7	Planet Labs, Inc
Flock 2K-34	Planet Labs, Inc.	Planet Labs, Inc.	USA	14.07.2017	2017	3.7	Planet Labs, Inc
Flock 2K-35	Planet Labs, Inc.	Planet Labs, Inc.	USA	14.07.2017	2017	3.7	Planet Labs, Inc
Flock 2K-36	Planet Labs, Inc.	Planet Labs, Inc.	USA	14.07.2017	2017	3.7	Planet Labs, Inc
Flock 2K-37	Planet Labs, Inc.	Planet Labs, Inc.	USA	14.07.2017	2017	3.7	Planet Labs, Inc
Flock 2K-38	Planet Labs, Inc.	Planet Labs, Inc.	USA	14.07.2017	2017	3.7	Planet Labs, Inc
Flock 2K-39	Planet Labs, Inc.	Planet Labs, Inc.	USA	14.07.2017	2017	3.7	Planet Labs, Inc
Flock 2K-40	Planet Labs, Inc.	Planet Labs, Inc.	USA	14.07.2017	2017	3.7	Planet Labs, Inc
Flock 2K-41	Planet Labs, Inc.	Planet Labs, Inc.	USA	14.07.2017	2017	3.7	Planet Labs, Inc
Flock 2K-42	Planet Labs, Inc.	Planet Labs, Inc.	USA	14.07.2017	2017	3.7	Planet Labs, Inc
Flock 2K-43	Planet Labs, Inc.	Planet Labs, Inc.	USA	14.07.2017	2017	3.7	Planet Labs, Inc
Flock 2K-44	Planet Labs, Inc.	Planet Labs, Inc.	USA	14.07.2017	2017	3.7	Planet Labs, Inc
Flock 2K-45	Planet Labs, Inc.	Planet Labs, Inc.	USA	14.07.2017	2017	3.7	Planet Labs, Inc
Flock 2K-46	Planet Labs, Inc.	Planet Labs, Inc.	USA	14.07.2017	2017	3.7	Planet Labs, Inc
Flock 2K-47	Planet Labs, Inc.	Planet Labs, Inc.	USA	14.07.2017	2017	3.7	Planet Labs, Inc
Flock 2K-48	Planet Labs, Inc.	Planet Labs, Inc.	USA	14.07.2017	2017	3.7	Planet Labs, Inc
Kanopus-V-IK	SpaceFlightNow Launch Log (https://spaceflightnow.com/launch-log/; accessed May 17, 2018)	Roscosmos	Russia	14.07.2017	2017	12	Gunter's Space Page (http://space.skyrocket.de/doc_sdat/kanopus-v.htm)
Corvus-BC1	SpaceFlightNow Launch Log (https://spaceflightnow.com/launch-log/; accessed May 17, 2018)	Astro Digital	USA	14.07.2017	2017	22	Gunter's Space Page (http://space.skyrocket.de/doc_sdat/landmapper-bc.htm)
Corvus-BC2	SpaceFlightNow Launch Log (https://spaceflightnow.com/launch-log/; accessed May 17, 2018)	Astro Digital	USA	14.07.2017	2017	22	Gunter's Space Page (http://space.skyrocket.de/doc_sdat/landmapper-bc.htm)
NanoACE	SpaceFlightNow Launch Log (https://spaceflightnow.com/launch-log/; accessed May 17, 2018)	Tyvak	USA	14.07.2017	2017	unknown
WNISAT 1R	SpaceFlightNow Launch Log (https://spaceflightnow.com/launch-log/; accessed May 17, 2018)	Weathernews & Axelspace	Japan	14.07.2017	2017	400	AxelSpace (https://www.axelspace.com/en/solution_/wnisat1r/)
Venus	SpaceFlightNow Launch Log (https://spaceflightnow.com/launch-log/; accessed May 17, 2018)	French & Israeli Space Agencies	France & Israel	01.8.2017	2017	5	Space Flight Now (https://spaceflightnow.com/2017/08/02/vega-launcher-achieves-on-target-deployment-of-earth-imaging-satellites/)
Formosat 5	SpaceFlightNow Launch Log (https://spaceflightnow.com/launch-log/; accessed May 17, 2018)	Taiwan National Space Organization	Taiwan	24.8.2017	2017	2	Space Flight Now (https://spaceflightnow.com/2017/08/25/taiwanese-satellite-rides-spacex-rocket-into-orbit/)
VRSS 2	SpaceFlightNow Launch Log (https://spaceflightnow.com/launch-log/; accessed May 17, 2018)	Venezuela Governmnet	Venezuela	09.10.2017	2017	1	Space Flight Now (https://spaceflightnow.com/2017/10/09/china-successfully-launches-earth-imaging-satellite-for-venezuela/)
SkySat-8	Planet Labs, Inc.	Planet Labs, Inc.	USA	17.10.2017	2017	0.8	Planet Labs, Inc
SkySat-9	Planet Labs, Inc.	Planet Labs, Inc.	USA	17.10.2017	2017	0.8	Planet Labs, Inc
SkySat-10	Planet Labs, Inc.	Planet Labs, Inc.	USA	17.10.2017	2017	0.8	Planet Labs, Inc
SkySat-11	Planet Labs, Inc.	Planet Labs, Inc.	USA	17.10.2017	2017	0.8	Planet Labs, Inc
SkySat-12	Planet Labs, Inc.	Planet Labs, Inc.	USA	17.10.2017	2017	0.8	Planet Labs, Inc
SkySat-13	Planet Labs, Inc.	Planet Labs, Inc.	USA	17.10.2017	2017	0.8	Planet Labs, Inc
Flock 3M-1	Planet Labs, Inc.	Planet Labs, Inc.	USA	17.10.2017	2017	3.7	Planet Labs, Inc
Flock 3M-2	Planet Labs, Inc.	Planet Labs, Inc.	USA	17.10.2017	2017	3.7	Planet Labs, Inc
Flock 3M-3	Planet Labs, Inc.	Planet Labs, Inc.	USA	17.10.2017	2017	3.7	Planet Labs, Inc
Flock 3M-4	Planet Labs, Inc.	Planet Labs, Inc.	USA	17.10.2017	2017	3.7	Planet Labs, Inc
Mohammed VI-A	SpaceFlightNow Launch Log (https://spaceflightnow.com/launch-log/; accessed May 17, 2018)	Moroccan Government	Morocco	07.11.2017	2017	unknown
Fengyun 3D	SpaceFlightNow Launch Log (https://spaceflightnow.com/launch-log/; accessed May 17, 2018)	China Meteorological Administration	China	14.11.2017	2017	250	Spaceflight 101 (http://spaceflight101.com/spacecraft/fengyun-3d/)
Jilin 1-04	SpaceFlightNow Launch Log (https://spaceflightnow.com/launch-log/; accessed May 17, 2018)	Chang Guang Satellite Tech. Co	China	20.11.2017	2017	1	Gunter's Space Page (http://space.skyrocket.de/doc_sdat/jilin-1-video-04.htm)
Jilin 1-05	SpaceFlightNow Launch Log (https://spaceflightnow.com/launch-log/; accessed May 17, 2018)	Chang Guang Satellite Tech. Co	China	20.11.2017	2017	1	Gunter's Space Page (http://space.skyrocket.de/doc_sdat/jilin-1-video-04.htm)
Jilin 1-06	SpaceFlightNow Launch Log (https://spaceflightnow.com/launch-log/; accessed May 17, 2018)	Chang Guang Satellite Tech. Co	China	20.11.2017	2017	1	Gunter's Space Page (http://space.skyrocket.de/doc_sdat/jilin-1-video-04.htm)
GCOM-C	SpaceFlightNow Launch Log (https://spaceflightnow.com/launch-log/; accessed May 17, 2018)	Japan Aerospace Exploration Agency	Japan	22.12.2017	2017	250	EO Portal (https://directory.eoportal.org/web/eoportal/satellite-missions/g/gcom-c1)
SuperView- 03	SpaceFlightNow Launch Log (https://spaceflightnow.com/launch-log/; accessed June 17, 2022)	Beijing Space View Technology	China	09.01.2018	2018	2	Space Flight Now (https://spaceflightnow.com/2018/01/09/second-superview-satellite-pair-launched-from-china/)
SuperView- 04	SpaceFlightNow Launch Log (https://spaceflightnow.com/launch-log/; accessed June 17, 2022)	Beijing Space View Technology	China	09.01.2018	2018	2	Space Flight Now (https://spaceflightnow.com/2018/01/09/second-superview-satellite-pair-launched-from-china/)
Cartosat 2F	SpaceFlightNow Launch Log (https://spaceflightnow.com/launch-log/; accessed June 17, 2022)	Indian Space Research Organization (ISRO)	India	12.01.2018	2018	1	Space Flight Now (https://spaceflightnow.com/2018/01/12/pslv-c-40-coverage/)
Kanopus-V 3	SpaceFlightNow Launch Log (https://spaceflightnow.com/launch-log/; accessed June 17, 2022)	Roscosmos	Russia	01.02.2018	2018	10.5	Space Flight 101 (https://spaceflight101.com/soyuz-kanopus-v-3-4/kanopus-v/)
Kanopus-V 4	SpaceFlightNow Launch Log (https://spaceflightnow.com/launch-log/; accessed June 17, 2022)	Roscosmos	Russia	01.02.2018	2018	10.5	Space Flight 101 (https://spaceflight101.com/soyuz-kanopus-v-3-4/kanopus-v/)
Paz	SpaceFlightNow Launch Log (https://spaceflightnow.com/launch-log/; accessed June 17, 2022)	Hisdesat	Spain	22.02.2018	2018	0.25	Space Flight Now (https://spaceflightnow.com/2018/02/22/recycled-spacex-rocket-boosts-paz-radar-satellite-first-starlink-testbeds-into-orbit/)
GOES-17	SpaceFlightNow Launch Log (https://spaceflightnow.com/launch-log/; accessed June 17, 2022)	NASA/NOAA	USA	01.03.2018	2018	500	https://journals.ametsoc.org/view/journals/bams/99/11/bams-d-17-0272.1.xml
Gaofen 1-02	SpaceFlightNow Launch Log (https://spaceflightnow.com/launch-log/; accessed June 17, 2022)	China Spacesat (China Aerospace Science and Technology Corporation (CASTC)	China	31.03.2018	2018	2	https://spaceflightnow.com/2018/04/03/three-gaofen-earth-observation-satellites-launched-by-china/
Gaofen 1-03	SpaceFlightNow Launch Log (https://spaceflightnow.com/launch-log/; accessed June 17, 2022)	China Spacesat (China Aerospace Science and Technology Corporation (CASTC)	China	31.03.2018	2018	2	https://spaceflightnow.com/2018/04/03/three-gaofen-earth-observation-satellites-launched-by-china/
Gaofen 1-04	SpaceFlightNow Launch Log (https://spaceflightnow.com/launch-log/; accessed June 17, 2022)	China Spacesat (China Aerospace Science and Technology Corporation (CASTC)	China	31.03.2018	2018	2	https://spaceflightnow.com/2018/04/03/three-gaofen-earth-observation-satellites-launched-by-china/
Sentinel 3B	SpaceFlightNow Launch Log (https://spaceflightnow.com/launch-log/; accessed June 17, 2022)	EUMETSAT/Copernicus	ESA	25.04.2018	2018	300	https://ladsweb.modaps.eosdis.nasa.gov/missions-and-measurements/olci/	https://spaceflightnow.com/2018/04/25/european-environmental-observer-launched-by-russian-rocket/
OHS-01	SpaceFlightNow Launch Log (https://spaceflightnow.com/launch-log/; accessed June 17, 2022)	Zhuhai Orbita Aerospace Science and Technology Co.	China	26.04.2018	2018	10	https://spaceflightnow.com/2018/04/26/long-march-11-rocket-delivers-five-commercial-satellites-to-orbit/
OHS-02	SpaceFlightNow Launch Log (https://spaceflightnow.com/launch-log/; accessed June 17, 2022)	Zhuhai Orbita Aerospace Science and Technology Co.	China	26.04.2018	2018	10	https://spaceflightnow.com/2018/04/26/long-march-11-rocket-delivers-five-commercial-satellites-to-orbit/
OHS-03	SpaceFlightNow Launch Log (https://spaceflightnow.com/launch-log/; accessed June 17, 2022)	Zhuhai Orbita Aerospace Science and Technology Co.	China	26.04.2018	2018	10	https://spaceflightnow.com/2018/04/26/long-march-11-rocket-delivers-five-commercial-satellites-to-orbit/
OHS-04	SpaceFlightNow Launch Log (https://spaceflightnow.com/launch-log/; accessed June 17, 2022)	Zhuhai Orbita Aerospace Science and Technology Co.	China	26.04.2018	2018	10	https://spaceflightnow.com/2018/04/26/long-march-11-rocket-delivers-five-commercial-satellites-to-orbit/
Gaofen 5	SpaceFlightNow Launch Log (https://spaceflightnow.com/launch-log/; accessed June 17, 2022)	China Aerospace Science and Technology Corporation (CASTC)	China	08.05.2018	2018	30	https://ui.adsabs.harvard.edu/abs/2020E%26ES..509a2033L/abstract	https://spaceflightnow.com/2018/05/09/chinese-satellite-successfully-launched-to-monitor-environment/
Gaofen 6	SpaceFlightNow Launch Log (https://spaceflightnow.com/launch-log/; accessed June 17, 2022)	China Aerospace Science and Technology Corporation (CASTC)	China	02.06.2018	2018	2	https://nssdc.gsfc.nasa.gov/nmc/spacecraft/display.action?id=2018-048A	https://spaceflightnow.com/2018/06/03/earth-observers-delivered-to-space-by-long-march-2d-rocket/
Fengyun 2H	SpaceFlightNow Launch Log (https://spaceflightnow.com/launch-log/; accessed June 17, 2022)	China Aerospace Science and Technology Corporation (CASTC)	China	05.06.2018	2018	125	Space Flight 101 (https://spaceflight101.com/spacecraft/fengyun-2/)	https://spaceflightnow.com/2018/06/05/chinese-weather-satellite-successfully-boosted-into-orbit/
PRSS 1	SpaceFlightNow Launch Log (https://spaceflightnow.com/launch-log/; accessed June 17, 2022)	SUPARCO / CAST	Pakistan	09.07.2018	2018	1	https://spaceflightnow.com/2018/07/09/china-successfully-launches-two-satellites-for-pakistan/
Haiyang 1C	SpaceFlightNow Launch Log (https://spaceflightnow.com/launch-log/; accessed June 17, 2022)	China Aerospace Science and Technology Corporation (CASTC)	China	07.09.2018	2018	50	https://space.skyrocket.de/doc_sdat/hy-1c.htm	https://spaceflightnow.com/2018/09/09/china-launches-satellite-to-monitor-worlds-oceans/
SSTL S1-4	SpaceFlightNow Launch Log (https://spaceflightnow.com/launch-log/; accessed June 17, 2022)		UK	16.09.2018	2018	1	https://www.sstl.co.uk/space-portfolio/launched-missions/2010-2019/sstl-s1-4-launched-2018	https://spaceflightnow.com/2018/09/17/british-earth-imaging-satellites-ride-indian-rocket-into-orbit/
NovaSAR-1	SpaceFlightNow Launch Log (https://spaceflightnow.com/launch-log/; accessed June 17, 2022)	UK Space Agency, Australia’s Commonwealth Scientific and Industrial Research Organisation (CSIRO), the Indian Space Research Organisation (ISRO), the Republic of the Philippines Department of Science and Technology-Advanced Science and Techn	UK	16.09.2018	2018	6	https://research.csiro.au/cceo/novasar/novasar-introduction/novasar-1-user-guide/#polarisations	https://spaceflightnow.com/2018/09/17/british-earth-imaging-satellites-ride-indian-rocket-into-orbit/
GSAT 29	SpaceFlightNow Launch Log (https://spaceflightnow.com/launch-log/; accessed June 17, 2022)	Indian Space Research Organization (ISRO)	India	14.11.2018	2018	55	https://www.nasaspaceflight.com/2018/11/indian-gslv-rocket-gsat-29-launch/	https://spaceflightnow.com/2018/11/14/gslv-mk3-d2-gsat-29/
HySIS	SpaceFlightNow Launch Log (https://spaceflightnow.com/launch-log/; accessed June 17, 2022)	Indian Space Research Organization (ISRO)	India	29.11.2018	2018	30	https://space.oscar.wmo.int/instruments/view/hysis	https://spaceflightnow.com/2018/11/29/indian-rocket-launches-31-satellites/
SaudiSat 5A	SpaceFlightNow Launch Log (https://spaceflightnow.com/launch-log/; accessed June 17, 2022)	Saudi Arabia’s King Abdulaziz City for Science and Technology	Saudi Arabia	07.12.2018	2018	unknown		https://spaceflightnow.com/2018/12/07/china-launches-satellites-for-saudi-arabia/
SaudiSat 5B	SpaceFlightNow Launch Log (https://spaceflightnow.com/launch-log/; accessed June 17, 2022)	Saudi Arabia’s King Abdulaziz City for Science and Technology	Saudi Arabia	07.12.2018	2018	unknown		https://spaceflightnow.com/2018/12/07/china-launches-satellites-for-saudi-arabia/
Kanopus-V 5	SpaceFlightNow Launch Log (https://spaceflightnow.com/launch-log/; accessed June 17, 2022)	Roscosmos	Russia	27.12.2018	2018	5	https://space.skyrocket.de/doc_sdat/kanopus-v-ik.htm	https://spaceflightnow.com/2018/12/27/soyuz-28-satellite-cluster-launch/
Kanopus-V 6	SpaceFlightNow Launch Log (https://spaceflightnow.com/launch-log/; accessed June 17, 2022)	Roscosmos	Russia	27.12.2018	2018	5	https://space.skyrocket.de/doc_sdat/kanopus-v-ik.htm	https://spaceflightnow.com/2018/12/27/soyuz-28-satellite-cluster-launch/
GRUS 1	SpaceFlightNow Launch Log (https://spaceflightnow.com/launch-log/; accessed June 17, 2022)	Axelspace	Japan	27.12.2018	2018	2.5	https://www.axelspace.com/assets/pdf/history/grus1_en.pdf	https://spaceflightnow.com/2018/12/27/soyuz-28-satellite-cluster-launch/
RAPIS-1	https://spaceflightnow.com/2019/01/18/japans-epsilon-rocket-launches-seven-tech-demo-satellites/	Japan Aerospace Exploration Agency (JAXA)	Japan	2019-01-17	2019	unknown
RISESAT	https://spaceflightnow.com/2019/01/18/japans-epsilon-rocket-launches-seven-tech-demo-satellites/	Tohoku University	Japan	2019-01-18	2019	unknown
USA 290	https://spaceflightnow.com/2019/01/19/delta-4-heavy-rocket-launches-u-s-spy-satellite-into-unusual-orbit/	National Reconnaissance Office (NRO)	USA	2019-01-19	2019	0.15	https://space.skyrocket.de/doc_sdat/kh-11.htm
Jilin-1-10	https://spaceflightnow.com/2019/01/22/chinas-long-march-11-rocket-lofts-earth-imaging-and-tech-demo-satellites/	Chang Guang Satellite Technology Co. Ltd.	China	2019-01-21	2019	5	https://www.geosoluciones.cl/documentos/head/2020-Jilin1-Overview-VF-GS.PDF
Jilin-1-9	https://spaceflightnow.com/2019/01/22/chinas-long-march-11-rocket-lofts-earth-imaging-and-tech-demo-satellites/	Chang Guang Satellite Technology Co. Ltd.	China	2019-01-21	2019	5	https://www.geosoluciones.cl/documentos/head/2020-Jilin1-Overview-VF-GS.PDF
Lingque 1A	https://spaceflightnow.com/2019/01/22/chinas-long-march-11-rocket-lofts-earth-imaging-and-tech-demo-satellites/	Beijing ZeroG Technology Co. Ltd.	China	2019-01-21	2019	4	https://space.skyrocket.de/doc_sdat/lingque-1.htm
EgyptSat-A	http://www.russianspaceweb.com/egyptsat-a.html	National Authority for Remote Sensing and Space Science (NARSS)	Egypt	2019-02-21	2019	1	https://space.skyrocket.de/doc_sdat/egyptsat-2.htm
PRISMA	https://spaceflightnow.com/2019/03/22/all-italian-launch-from-french-guiana-lofts-innovative-environmental-satellite/	Italian Space Agency	Italy	2019-03-22	2019	30	https://www.eoportal.org/satellite-missions/prisma-hyperspectral#mission-capabilities
Dove 4a-11	https://spaceflightnow.com/2019/04/01/indian-military-satellite-20-more-planet-imaging-cubesats-aboard-successful-pslv-launch/	Planet Labs, Inc.	USA	2019-04-01	2019	3	https://www.eoportal.org/satellite-missions/planet#planet---flock-imaging-constellation
Dove 4a-17	https://spaceflightnow.com/2019/04/01/indian-military-satellite-20-more-planet-imaging-cubesats-aboard-successful-pslv-launch/	Planet Labs, Inc.	USA	2019-04-01	2019	3	https://www.eoportal.org/satellite-missions/planet#planet---flock-imaging-constellation
Dove 4a-19	https://spaceflightnow.com/2019/04/01/indian-military-satellite-20-more-planet-imaging-cubesats-aboard-successful-pslv-launch/	Planet Labs, Inc.	USA	2019-04-01	2019	3	https://www.eoportal.org/satellite-missions/planet#planet---flock-imaging-constellation
Dove 4a-2	https://spaceflightnow.com/2019/04/01/indian-military-satellite-20-more-planet-imaging-cubesats-aboard-successful-pslv-launch/	Planet Labs, Inc.	USA	2019-04-01	2019	3	https://www.eoportal.org/satellite-missions/planet#planet---flock-imaging-constellation
Dove 4a-5	https://spaceflightnow.com/2019/04/01/indian-military-satellite-20-more-planet-imaging-cubesats-aboard-successful-pslv-launch/	Planet Labs, Inc.	USA	2019-04-01	2019	3	https://www.eoportal.org/satellite-missions/planet#planet---flock-imaging-constellation
Dove 4a-6	https://spaceflightnow.com/2019/04/01/indian-military-satellite-20-more-planet-imaging-cubesats-aboard-successful-pslv-launch/	Planet Labs, Inc.	USA	2019-04-01	2019	3	https://www.eoportal.org/satellite-missions/planet#planet---flock-imaging-constellation
Dove 4a-9	https://spaceflightnow.com/2019/04/01/indian-military-satellite-20-more-planet-imaging-cubesats-aboard-successful-pslv-launch/	Planet Labs, Inc.	USA	2019-04-01	2019	3	https://www.eoportal.org/satellite-missions/planet#planet---flock-imaging-constellation
Jilin-1	https://spaceflightnow.com/2019/06/05/chinas-first-sea-launch-declared-a-success/	Chang Guang Satellite Technology Co. Ltd.	China	2019-06-05	2019	1	https://www.geosoluciones.cl/documentos/head/2020-Jilin1-Overview-VF-GS.PDF
Xiaoxiang 1-04	https://spaceflightnow.com/2019/06/05/chinas-first-sea-launch-declared-a-success/	Spacety Aerospace Company	China	2019-06-05	2019	5	https://space.skyrocket.de/doc_sdat/ty-1-04.htm
Raavana-1	https://timesofindia.indiatimes.com/world/south-asia/sri-lanka-successfully-launches-its-first-satellite-ravana-1-into-orbit/articleshow/69858285.cms	Kyushu Institute of Technology (KIT)	Sri Lanka	2019-06-17	2019	unknown
Falconsat-7	https://directory.eoportal.org/web/eoportal/satellite-missions/f/falconsat-7	US Air Force Academy	USA	2019-06-25	2019	1.8	https://spacenews.com/falconsat-7-features-innovative-telescope-design/	https://spacenews.com/falconsat-7-features-innovative-telescope-design/
BlackSky Global 3	https://spaceflightnow.com/2019/06/29/rocket-lab-flies-again-from-new-zealand-as-construction-advances-at-virginia-launch-pad/	BlackSky Global	USA	2019-06-29	2019	1	https://webapps.itc.utwente.nl/sensor/getsat.aspx?name=BlackSky%20Global%203
Painani-1	https://www.nanosats.eu/sat/painani-1	Mexico Secretariat of National Defense (SEDENA)	Mexico	2019-06-29	2019	unknown
DoT-1	https://www.sstl.co.uk/space-portfolio/launched-missions/2010-2020/dot-1-launched-2019	Surrey Satellite Technology Ltd.	United Kingdom	2019-07-05	2019	unknown
ORCA-2	https://epic.org/privacy/cybersecurity/EPIC-15-09-23-DARPA-FOIA-20170921-Production-FY2016-Budget2.pdf	Defense Advanced Research Projects Agency (DARPA)	USA	2019-08-08	2019	unknown
Qiancheng-01	https://spaceflightnow.com/2019/08/17/chinas-jielong-1-smallsat-launcher-successful-on-first-flight/	Qiansheng Exploration Technology Co. Ltd.	China	2019-08-17	2019	2	https://space.skyrocket.de/doc_sdat/qiancheng-01.htm
Xingshidai 5	https://www.nasaspaceflight.com/2019/08/china-first-launch-smart-dragon-1-small-satellite-vehicle/	Chengdu Guoxing Aerospace Technology Co. Ltd.	China	2019-08-17	2019	10	https://www.nanosats.eu/sat/xingshidai-5
BlackSky Global 4	https://spaceflightnow.com/2019/08/19/rocket-lab-launch-fulfills-initial-block-of-blacksky-earth-imaging-satellites/	BlackSky Global	USA	2019-08-19	2019	1	https://nssdc.gsfc.nasa.gov/nmc/spacecraft/display.action?id=2019-054E
Jingshi-1	https://spaceflightnow.com/2019/09/12/china-launches-earth-observing-satellites-solar-sail-experiment/	Chinese University Corporation for Polar Research	China	2019-09-12	2019	8	https://space.skyrocket.de/doc_sdat/bnu-1.htm
Ziyuan 1-2D	https://spaceflightnow.com/2019/09/12/china-launches-earth-observing-satellites-solar-sail-experiment/	China Centre for Resources Satellite Data and Application (CRESDA)	China	2019-09-14	2019	5	https://space.skyrocket.de/doc_sdat/zy-1-02d.htm
OHS-5	https://spaceflightnow.com/2019/09/19/five-chinese-smallsats-launched-by-long-march-11-rocket/	Zhuhai Orbita Control Engineering Co. Ltd.	China	2019-09-19	2019	10	https://apollomapping.com/ohs-satellite-imagery
OHS-6	https://spaceflightnow.com/2019/09/19/five-chinese-smallsats-launched-by-long-march-11-rocket/	Zhuhai Orbita Control Engineering Co. Ltd.	China	2019-09-19	2019	10	https://apollomapping.com/ohs-satellite-imagery
OHS-7	https://spaceflightnow.com/2019/09/19/five-chinese-smallsats-launched-by-long-march-11-rocket/	Zhuhai Orbita Control Engineering Co. Ltd.	China	2019-09-19	2019	10	https://apollomapping.com/ohs-satellite-imagery
OHS-8	https://spaceflightnow.com/2019/09/19/five-chinese-smallsats-launched-by-long-march-11-rocket/	Zhuhai Orbita Control Engineering Co. Ltd.	China	2019-09-19	2019	10	https://apollomapping.com/ohs-satellite-imagery
OVS-3	https://spaceflightnow.com/2019/09/19/five-chinese-smallsats-launched-by-long-march-11-rocket/	Zhuhai Orbita Control Engineering Co. Ltd.	China	2019-09-19	2019	10	https://apollomapping.com/ohs-satellite-imagery
Gaofen 10	https://spaceflightnow.com/2019/10/06/china-launches-new-gaofen-earth-imaging-satellite/	China National Academy of Sciences (CNSAS)	China	2019-10-04	2019	1	https://spaceflightnow.com/2019/10/06/china-launches-new-gaofen-earth-imaging-satellite/
Gaofen 7	https://spaceflightnow.com/2019/11/03/chinese-mapping-satellite-launches-on-long-march-4b-rocket/	Ministry of Natural Resources/Ministry of Housing and Urban-Rural Development/National Bureau of Statistics	China	2019-11-03	2019	1	https://spaceflightnow.com/2019/10/06/china-launches-new-gaofen-earth-imaging-satellite/
SRSS-1	https://africanews.space/sudan-has-launched-its-first-satellite-a-remote-sensing-satellite/	Government of Sudan	Sudan	2019-11-03	2019	unknown
Jilin-1 Gaofen 02A	https://spaceflightnow.com/2019/11/13/two-chinese-satellite-launchers-lift-off-three-hours-apart/	Chang Guang Satellite Technology Co. Ltd.	China	2019-11-13	2019	0.75	https://www.geosoluciones.cl/documentos/head/2020-Jilin1-Overview-VF-GS.PDF
CartoSat 3	https://spaceflightnow.com/2019/11/27/pslv-delivers-indias-highest-resolution-earth-observation-satellite-to-orbit/	Indian Space Research Organization (ISRO)	India	2019-11-27	2019	0.28	https://www.nrsc.gov.in/sites/default/files/pdf/training/C3_BROCHURE_JAN2021_modified.pdf
Dove 4p-1	https://spaceflightnow.com/2019/11/27/pslv-delivers-indias-highest-resolution-earth-observation-satellite-to-orbit/	Planet Labs, Inc.	USA	2019-11-27	2019	10	https://www.wrl.unsw.edu.au/sites/wrl/files/uploads/Publications/2021CoastsandPorts_025_doherty_finalpaper.pdf
Dove 4p-10	https://spaceflightnow.com/2019/11/27/pslv-delivers-indias-highest-resolution-earth-observation-satellite-to-orbit/	Planet Labs, Inc.	USA	2019-11-27	2019	10	https://www.wrl.unsw.edu.au/sites/wrl/files/uploads/Publications/2021CoastsandPorts_025_doherty_finalpaper.pdf
Dove 4p-11	https://spaceflightnow.com/2019/11/27/pslv-delivers-indias-highest-resolution-earth-observation-satellite-to-orbit/	Planet Labs, Inc.	USA	2019-11-27	2019	10	https://www.wrl.unsw.edu.au/sites/wrl/files/uploads/Publications/2021CoastsandPorts_025_doherty_finalpaper.pdf
Dove 4p-3	https://spaceflightnow.com/2019/11/27/pslv-delivers-indias-highest-resolution-earth-observation-satellite-to-orbit/	Planet Labs, Inc.	USA	2019-11-27	2019	10	https://www.wrl.unsw.edu.au/sites/wrl/files/uploads/Publications/2021CoastsandPorts_025_doherty_finalpaper.pdf
Dove 4p-4	https://spaceflightnow.com/2019/11/27/pslv-delivers-indias-highest-resolution-earth-observation-satellite-to-orbit/	Planet Labs, Inc.	USA	2019-11-27	2019	10	https://www.wrl.unsw.edu.au/sites/wrl/files/uploads/Publications/2021CoastsandPorts_025_doherty_finalpaper.pdf
Dove 4p-5	https://spaceflightnow.com/2019/11/27/pslv-delivers-indias-highest-resolution-earth-observation-satellite-to-orbit/	Planet Labs, Inc.	USA	2019-11-27	2019	10	https://www.wrl.unsw.edu.au/sites/wrl/files/uploads/Publications/2021CoastsandPorts_025_doherty_finalpaper.pdf
Dove 4p-7	https://spaceflightnow.com/2019/11/27/pslv-delivers-indias-highest-resolution-earth-observation-satellite-to-orbit/	Planet Labs, Inc.	USA	2019-11-27	2019	10	https://www.wrl.unsw.edu.au/sites/wrl/files/uploads/Publications/2021CoastsandPorts_025_doherty_finalpaper.pdf
Jilin-1 Gaofen 02B	https://spaceflightnow.com/2019/12/07/china-launches-two-kuaizhou-rockets-in-six-hours/	Chang Guang Satellite Technology Co. Ltd.	China	2019-12-07	2019	0.75	https://www.geosoluciones.cl/documentos/head/2020-Jilin1-Overview-VF-GS.PDF
ETRSS-1	https://africanews.space/ethiopia-launches-first-satellite-named-etrss-1-from-china/	Ethiopian Space Science and Technology Institute	Ethiopia	2019-12-20	2019	10	https://www.essoar.org/doi/pdf/10.1002/essoar.10502532.1
CBERS 4A	https://directory.eoportal.org/web/eoportal/satellite-missions/c-missions/cbers-4a	China National Space Administration (CNSA)/National Institute for Space Research (Brazil)	China/Brazil	2019-12-21	2019	2	https://spaceflightnow.com/2019/12/21/china-launches-environmental-satellite-built-in-cooperation-with-brazil/
Jilin-1 Kuanfu-1	https://spaceflightnow.com/2020/01/15/argentine-satellites-hitch-ride-with-chinese-payloads-on-long-march-2d-rocket/	Chang Guang Satellite Technology Co. Ltd.	China	2020-01-15	2020	4	https://space.skyrocket.de/doc_sdat/jilin-1-kuanfu-01.htm
ÑuSat-7 (Sophie)	https://spaceflightnow.com/2020/01/15/argentine-satellites-hitch-ride-with-chinese-payloads-on-long-march-2d-rocket/	Satellogic S.A.	Argentina	2020-01-15	2020	1	https://spaceflightnow.com/2020/01/15/argentine-satellites-hitch-ride-with-chinese-payloads-on-long-march-2d-rocket/
ÑuSat-8 (Marie)	https://spaceflightnow.com/2020/01/15/argentine-satellites-hitch-ride-with-chinese-payloads-on-long-march-2d-rocket/	Satellogic S.A.	Argentina	2020-01-15	2020	1	https://spaceflightnow.com/2020/01/15/argentine-satellites-hitch-ride-with-chinese-payloads-on-long-march-2d-rocket/
IGS Optical 7	https://spaceflightnow.com/2020/02/09/h-2a-f41-launch/	Mitsubishi Electric	Japan	2020-02-09	2020	0.4	https://space.skyrocket.de/doc_sdat/igs-optical-5.htm
USA 300	https://spaceflightnow.com/2020/05/17/upgraded-x-37b-spaceplane-rockets-into-orbit-aboard-atlas-5-launcher/	US Air Force Academy	USA	2020-05-17	2020	unknown
Gaofen 9-02	https://spaceflightnow.com/2020/06/01/two-chinese-launches-deploy-satellites-for-earth-imaging-tech-demonstrations/	Shanghai Academy of Spaceflight Technology (SAST)	China	2020-05-31	2020	1	https://space.skyrocket.de/doc_sdat/gf-9.htm
SkySat-16	https://spaceflightnow.com/2020/06/13/starlink-satellite-deployments-continue-with-successful-falcon-9-launch/	Space Systems/Loral	USA	2020-06-13	2020	0.9	https://www.eoportal.org/satellite-missions/skysat#mission-capabilities
SkySat-17	https://spaceflightnow.com/2020/06/13/starlink-satellite-deployments-continue-with-successful-falcon-9-launch/	Space Systems/Loral	USA	2020-06-13	2020	0.9	https://www.eoportal.org/satellite-missions/skysat#mission-capabilities
SkySat-18	https://spaceflightnow.com/2020/06/13/starlink-satellite-deployments-continue-with-successful-falcon-9-launch/	Space Systems/Loral	USA	2020-06-13	2020	0.9	https://www.eoportal.org/satellite-missions/skysat#mission-capabilities
Gaofen 9-03	https://spaceflightnow.com/2020/06/17/china-launches-earth-observation-satellite/	Shanghai Academy of Spaceflight Technology (SAST)	China	2020-06-17	2020	1	https://spaceflightnow.com/2020/06/17/china-launches-earth-observation-satellite/
Gaofen Multi-Mode 1	https://global.chinadaily.com.cn/a/202007/03/WS5efeb59fa3108348172570e7.html	China Academy of Space Technology (CAST)	China	2020-07-03	2020	0.5	https://forum.nasaspaceflight.com/index.php?topic=51367.0
Ofeq 16	https://spaceflightnow.com/2020/07/06/israel-successfully-places-surveillance-satellite-into-orbit/	Israel Aerospace Industries (IAI)	Israel	2020-07-06	2020	0.5	https://www.defensenews.com/space/2020/07/06/israel-launches-ofek-16-satellite-to-complete-intelligence-coverage/
USA 305	https://spaceflightnow.com/2020/07/15/minotaur-rocket-successfully-deploys-four-nro-satellites-in-orbit/	National Reconnaissance Office (NRO)	USA	2020-07-15	2020	unknown
USA 306	https://spaceflightnow.com/2020/07/15/minotaur-rocket-successfully-deploys-four-nro-satellites-in-orbit/	Unknown	USA	2020-07-15	2020	unknown
USA 307	https://spaceflightnow.com/2020/07/15/minotaur-rocket-successfully-deploys-four-nro-satellites-in-orbit/	Unknown	USA	2020-07-15	2020	unknown
USA 308	https://spaceflightnow.com/2020/07/15/minotaur-rocket-successfully-deploys-four-nro-satellites-in-orbit/	Unknown	USA	2020-07-15	2020	unknown
Ziyuan 3-3	https://spaceflightnow.com/2020/07/25/china-launches-high-resolution-mapping-satellite/	China Academy of Space Technology (CAST)	China	2020-07-25	2020	2.1	https://space.skyrocket.de/doc_sdat/zy-3.htm
Gaofen 9-04	https://spaceflightnow.com/2020/08/06/earth-observation-and-research-satellites-ride-chinese-rocket-into-orbit/	Shanghai Academy of Spaceflight Technology (SAST)	China	2020-08-06	2020	1	https://space.skyrocket.de/doc_sdat/gf-9.htm
BlackSky Global 7	https://spaceflightnow.com/2020/08/07/spacex-closes-out-busy-week-with-launch-of-more-starlink-satellites/	LeoStella	USA/Thales Alenia Space	2020-08-07	2020	1	https://space.skyrocket.de/doc_sdat/blacksky-global.htm
BlackSky Global 8	https://spaceflightnow.com/2020/08/07/spacex-closes-out-busy-week-with-launch-of-more-starlink-satellites/	LeoStella	USA/Thales Alenia Space	2020-08-07	2020	1	https://space.skyrocket.de/doc_sdat/blacksky-global.htm
SkySat-19	https://spaceflightnow.com/2020/08/18/spacex-adds-more-satellites-to-ever-growing-starlink-network/	Maxar	UK	2020-08-18	2020	0.9	https://spaceflight101.com/vega-vv07/skysat-satellites/
SkySat-20	https://spaceflightnow.com/2020/08/18/spacex-adds-more-satellites-to-ever-growing-starlink-network/	Maxar	UK	2020-08-18	2020	0.9	https://spaceflight101.com/vega-vv07/skysat-satellites/
SkySat-21	https://spaceflightnow.com/2020/08/18/spacex-adds-more-satellites-to-ever-growing-starlink-network/	Maxar	UK	2020-08-18	2020	0.9	https://spaceflight101.com/vega-vv07/skysat-satellites/
Gaofen 9-05	https://spaceflightnow.com/2020/08/24/china-launches-another-gaofen-earth-observation-satellite/	Shanghai Academy of Spaceflight Technology (SAST)	China	2020-08-23	2020	1	https://spaceflightnow.com/2020/08/24/china-launches-another-gaofen-earth-observation-satellite/
Dove 4v-1	https://spaceflightnow.com/2020/09/03/vega-rocket-deploys-53-satellites-on-successful-return-to-flight-mission/	Planet Labs, Inc.	USA	2020-09-02	2020	3	https://www.planet.com/pulse/flock-4v-captivating-first-light-imagery/
Dove 4v-10	https://spaceflightnow.com/2020/09/03/vega-rocket-deploys-53-satellites-on-successful-return-to-flight-mission/	Planet Labs, Inc.	USA	2020-09-02	2020	3	https://www.planet.com/pulse/flock-4v-captivating-first-light-imagery/
Dove 4v-11	https://spaceflightnow.com/2020/09/03/vega-rocket-deploys-53-satellites-on-successful-return-to-flight-mission/	Planet Labs, Inc.	USA	2020-09-02	2020	3	https://www.planet.com/pulse/flock-4v-captivating-first-light-imagery/
Dove 4v-12	https://spaceflightnow.com/2020/09/03/vega-rocket-deploys-53-satellites-on-successful-return-to-flight-mission/	Planet Labs, Inc.	USA	2020-09-02	2020	3	https://www.planet.com/pulse/flock-4v-captivating-first-light-imagery/
Dove 4v-13	https://spaceflightnow.com/2020/09/03/vega-rocket-deploys-53-satellites-on-successful-return-to-flight-mission/	Planet Labs, Inc.	USA	2020-09-02	2020	3	https://www.planet.com/pulse/flock-4v-captivating-first-light-imagery/
Dove 4v-14	https://spaceflightnow.com/2020/09/03/vega-rocket-deploys-53-satellites-on-successful-return-to-flight-mission/	Planet Labs, Inc.	USA	2020-09-02	2020	3	https://www.planet.com/pulse/flock-4v-captivating-first-light-imagery/
Dove 4v-2	https://spaceflightnow.com/2020/09/03/vega-rocket-deploys-53-satellites-on-successful-return-to-flight-mission/	Planet Labs, Inc.	USA	2020-09-02	2020	3	https://www.planet.com/pulse/flock-4v-captivating-first-light-imagery/
Dove 4v-4	https://spaceflightnow.com/2020/09/03/vega-rocket-deploys-53-satellites-on-successful-return-to-flight-mission/	Planet Labs, Inc.	USA	2020-09-02	2020	3	https://www.planet.com/pulse/flock-4v-captivating-first-light-imagery/
Dove 4v-5	https://spaceflightnow.com/2020/09/03/vega-rocket-deploys-53-satellites-on-successful-return-to-flight-mission/	Planet Labs, Inc.	USA	2020-09-02	2020	3	https://www.planet.com/pulse/flock-4v-captivating-first-light-imagery/
Dove 4v-6	https://spaceflightnow.com/2020/09/03/vega-rocket-deploys-53-satellites-on-successful-return-to-flight-mission/	Planet Labs, Inc.	USA	2020-09-02	2020	3	https://www.planet.com/pulse/flock-4v-captivating-first-light-imagery/
Dove 4v-7	https://spaceflightnow.com/2020/09/03/vega-rocket-deploys-53-satellites-on-successful-return-to-flight-mission/	Planet Labs, Inc.	USA	2020-09-02	2020	3	https://www.planet.com/pulse/flock-4v-captivating-first-light-imagery/
Dove 4v-8	https://spaceflightnow.com/2020/09/03/vega-rocket-deploys-53-satellites-on-successful-return-to-flight-mission/	Planet Labs, Inc.	USA	2020-09-02	2020	3	https://www.planet.com/pulse/flock-4v-captivating-first-light-imagery/
Dove 4v-9	https://spaceflightnow.com/2020/09/03/vega-rocket-deploys-53-satellites-on-successful-return-to-flight-mission/	Planet Labs, Inc.	USA	2020-09-02	2020	3	https://www.planet.com/pulse/flock-4v-captivating-first-light-imagery/
FSSCAT-A	https://directory.eoportal.org/web/eoportal/satellite-missions/p/phisat-1	consortium of European companies and institutes	ESA	2020-09-02	2020	unknown
FSSCAT-B	https://directory.eoportal.org/web/eoportal/satellite-missions/p/phisat-1	consortium of European companies and institutes	ESA	2020-09-02	2020	unknown
NAPA-1	https://www.bangkokpost.com/tech/1979315/air-force-satellite-napa-1-launched	Innovative Solutions in Space	Netherlands	2020-09-02	2020	5	https://space.skyrocket.de/doc_sdat/napa-1.htm
ÑuSat-6	https://spaceflightnow.com/2020/09/03/vega-rocket-deploys-53-satellites-on-successful-return-to-flight-mission/	Satellogic	Argentina	2020-09-02	2020	1	https://nssdc.gsfc.nasa.gov/nmc/spacecraft/display.action?id=2020-061A
Gaofen 11-02	https://spaceflightnow.com/2020/09/08/china-launches-another-gaofen-earth-observation-satellite-2/	Shanghai Academy of Spaceflight Technology (SAST)	China	2020-09-07	2020	0.1	https://www.space.com/china-launches-earth-observation-gaofen-satellites
Jilin-1 Gaofen 03B-01	https://spaceflightnow.com/2020/09/17/china-successfully-launches-satellites-from-ocean-going-platform/	Chang Guang Satellite Technology Co. Ltd.	China	2020-09-14	2020	1	https://spaceflightnow.com/2020/09/17/china-successfully-launches-satellites-from-ocean-going-platform/
Jilin-1 Gaofen 03B-02	https://spaceflightnow.com/2020/09/17/china-successfully-launches-satellites-from-ocean-going-platform/	Chang Guang Satellite Technology Co. Ltd.	China	2020-09-14	2020	1	https://spaceflightnow.com/2020/09/17/china-successfully-launches-satellites-from-ocean-going-platform/
Jilin-1 Gaofen 03B-03	https://spaceflightnow.com/2020/09/17/china-successfully-launches-satellites-from-ocean-going-platform/	Chang Guang Satellite Technology Co. Ltd.	China	2020-09-14	2020	1	https://spaceflightnow.com/2020/09/17/china-successfully-launches-satellites-from-ocean-going-platform/
Jilin-1 Gaofen 03B-04	https://spaceflightnow.com/2020/09/17/china-successfully-launches-satellites-from-ocean-going-platform/	Chang Guang Satellite Technology Co. Ltd.	China	2020-09-14	2020	1	https://spaceflightnow.com/2020/09/17/china-successfully-launches-satellites-from-ocean-going-platform/
Jilin-1 Gaofen 03B-05	https://spaceflightnow.com/2020/09/17/china-successfully-launches-satellites-from-ocean-going-platform/	Chang Guang Satellite Technology Co. Ltd.	China	2020-09-14	2020	1	https://spaceflightnow.com/2020/09/17/china-successfully-launches-satellites-from-ocean-going-platform/
Jilin-1 Gaofen 03B-06	https://spaceflightnow.com/2020/09/17/china-successfully-launches-satellites-from-ocean-going-platform/	Chang Guang Satellite Technology Co. Ltd.	China	2020-09-14	2020	1	https://spaceflightnow.com/2020/09/17/china-successfully-launches-satellites-from-ocean-going-platform/
Jilin-1 Gaofen 03C-01	https://spaceflightnow.com/2020/09/17/china-successfully-launches-satellites-from-ocean-going-platform/	Chang Guang Satellite Technology Co. Ltd.	China	2020-09-14	2020	1	https://spaceflightnow.com/2020/09/17/china-successfully-launches-satellites-from-ocean-going-platform/
Jilin-1 Gaofen 03C-02	https://spaceflightnow.com/2020/09/17/china-successfully-launches-satellites-from-ocean-going-platform/	Chang Guang Satellite Technology Co. Ltd.	China	2020-09-14	2020	1	https://spaceflightnow.com/2020/09/17/china-successfully-launches-satellites-from-ocean-going-platform/
Jilin-1 Gaofen 03C-03	https://spaceflightnow.com/2020/09/17/china-successfully-launches-satellites-from-ocean-going-platform/	Chang Guang Satellite Technology Co. Ltd.	China	2020-09-14	2020	1	https://spaceflightnow.com/2020/09/17/china-successfully-launches-satellites-from-ocean-going-platform/
Dove 4v-15	https://spaceflightnow.com/2020/09/03/vega-rocket-deploys-53-satellites-on-successful-return-to-flight-mission/	Planet Labs, Inc.	USA	2020-09-25	2020	3	https://space.skyrocket.de/doc_sdat/flock-1.htm
Dove 4v-16	https://spaceflightnow.com/2020/09/03/vega-rocket-deploys-53-satellites-on-successful-return-to-flight-mission/	Planet Labs, Inc.	USA	2020-09-25	2020	3	https://space.skyrocket.de/doc_sdat/flock-1.htm
HJ-2A	https://spaceflightnow.com/2020/09/28/china-launches-environmental-monitoring-satellites/	China Academy of Space Technology (CAST)/DFH Satellite Co. Ltd.	China	2020-09-27	2020	3	https://space.skyrocket.de/doc_sdat/hj-2a.htm
HJ-2B	https://spaceflightnow.com/2020/09/28/china-launches-environmental-monitoring-satellites/	China Academy of Space Technology (CAST)/DFH Satellite Co. Ltd.	China	2020-09-27	2020	3	https://space.skyrocket.de/doc_sdat/hj-2a.htm
Dove 4v-17	https://spaceflightnow.com/2020/09/03/vega-rocket-deploys-53-satellites-on-successful-return-to-flight-mission/	Planet Labs, Inc.	USA	2020-10-02	2020	3	https://space.skyrocket.de/doc_sdat/flock-1.htm
Dove 4v-18	https://spaceflightnow.com/2020/09/03/vega-rocket-deploys-53-satellites-on-successful-return-to-flight-mission/	Planet Labs, Inc.	USA	2020-10-03	2020	3	https://space.skyrocket.de/doc_sdat/flock-1.htm
Dove 4v-19	https://spaceflightnow.com/2020/09/03/vega-rocket-deploys-53-satellites-on-successful-return-to-flight-mission/	Planet Labs, Inc.	USA	2020-10-03	2020	3	https://space.skyrocket.de/doc_sdat/flock-1.htm
Dove 4v-20	https://spaceflightnow.com/2020/09/03/vega-rocket-deploys-53-satellites-on-successful-return-to-flight-mission/	Planet Labs, Inc.	USA	2020-10-03	2020	3	https://space.skyrocket.de/doc_sdat/flock-1.htm
Dove 4v-22	https://spaceflightnow.com/2020/09/03/vega-rocket-deploys-53-satellites-on-successful-return-to-flight-mission/	Planet Labs, Inc.	USA	2020-10-03	2020	3	https://space.skyrocket.de/doc_sdat/flock-1.htm
Dove 4v-23	https://spaceflightnow.com/2020/09/03/vega-rocket-deploys-53-satellites-on-successful-return-to-flight-mission/	Planet Labs, Inc.	USA	2020-10-03	2020	3	https://space.skyrocket.de/doc_sdat/flock-1.htm
Dove 4v-24	https://spaceflightnow.com/2020/09/03/vega-rocket-deploys-53-satellites-on-successful-return-to-flight-mission/	Planet Labs, Inc.	USA	2020-10-03	2020	3	https://space.skyrocket.de/doc_sdat/flock-1.htm
Dove 4v-25	https://spaceflightnow.com/2020/09/03/vega-rocket-deploys-53-satellites-on-successful-return-to-flight-mission/	Planet Labs, Inc.	USA	2020-10-03	2020	3	https://space.skyrocket.de/doc_sdat/flock-1.htm
Dove 4v-26	https://spaceflightnow.com/2020/09/03/vega-rocket-deploys-53-satellites-on-successful-return-to-flight-mission/	Planet Labs, Inc.	USA	2020-10-03	2020	3	https://space.skyrocket.de/doc_sdat/flock-1.htm
Gaofen 13	https://spaceflightnow.com/2020/10/12/china-launches-geosynchronous-earth-observation-satellite/	Shanghai Academy of Spaceflight Technology (SAST)	China	2020-10-11	2020	15	https://space.skyrocket.de/doc_sdat/gf-13.htm
CE-SAT-2B	https://spaceflightnow.com/2020/10/28/rocket-lab-successfully-launches-satellites-for-planet-and-canon/	Canon Electronics Space Technology Laboratory	Japan	2020-10-28	2020	5.1	https://space.skyrocket.de/doc_sdat/ce-sat-2.htm
Dove 4e'-1	https://spaceflightnow.com/2020/10/28/rocket-lab-successfully-launches-satellites-for-planet-and-canon/	Planet Labs, Inc.	USA	2020-10-28	2020	3	https://space.skyrocket.de/doc_sdat/flock-1.htm
Dove 4e’-2	https://spaceflightnow.com/2020/10/28/rocket-lab-successfully-launches-satellites-for-planet-and-canon/	Planet Labs, Inc.	USA	2020-10-28	2020	3	https://space.skyrocket.de/doc_sdat/flock-1.htm
Dove 4e’-3	https://spaceflightnow.com/2020/10/28/rocket-lab-successfully-launches-satellites-for-planet-and-canon/	Planet Labs, Inc.	USA	2020-10-28	2020	3	https://space.skyrocket.de/doc_sdat/flock-1.htm
Dove 4e’-4	https://spaceflightnow.com/2020/10/28/rocket-lab-successfully-launches-satellites-for-planet-and-canon/	Planet Labs, Inc.	USA	2020-10-28	2020	3	https://space.skyrocket.de/doc_sdat/flock-1.htm
Dove 4e’-5	https://spaceflightnow.com/2020/10/28/rocket-lab-successfully-launches-satellites-for-planet-and-canon/	Planet Labs, Inc.	USA	2020-10-28	2020	3	https://space.skyrocket.de/doc_sdat/flock-1.htm
Dove 4e’-6	https://spaceflightnow.com/2020/10/28/rocket-lab-successfully-launches-satellites-for-planet-and-canon/	Planet Labs, Inc.	USA	2020-10-28	2020	3	https://space.skyrocket.de/doc_sdat/flock-1.htm
Dove 4e'-8	https://spaceflightnow.com/2020/10/28/rocket-lab-successfully-launches-satellites-for-planet-and-canon/	Planet Labs, Inc.	USA	2020-10-28	2020	3	https://space.skyrocket.de/doc_sdat/flock-1.htm
Dove 4e’-8	https://spaceflightnow.com/2020/10/28/rocket-lab-successfully-launches-satellites-for-planet-and-canon/	Planet Labs, Inc.	USA	2020-10-28	2020	3	https://space.skyrocket.de/doc_sdat/flock-1.htm
Dove 4e’-9	https://spaceflightnow.com/2020/10/28/rocket-lab-successfully-launches-satellites-for-planet-and-canon/	Planet Labs, Inc.	USA	2020-10-28	2020	3	https://space.skyrocket.de/doc_sdat/flock-1.htm
ÑuSat-10	https://spaceflightnow.com/2020/11/06/ten-satellogic-earth-imaging-satellites-successfully-launched/	Satellogic	Argentina	2020-11-06	2020	0.7	https://spaceflightnow.com/2020/11/06/ten-satellogic-earth-imaging-satellites-successfully-launched/
ÑuSat-11	https://spaceflightnow.com/2020/11/06/ten-satellogic-earth-imaging-satellites-successfully-launched/	Satellogic	Argentina	2020-11-06	2020	0.7	https://spaceflightnow.com/2020/11/06/ten-satellogic-earth-imaging-satellites-successfully-launched/
ÑuSat-12	https://spaceflightnow.com/2020/11/06/ten-satellogic-earth-imaging-satellites-successfully-launched/	Satellogic	Argentina	2020-11-06	2020	0.7	https://spaceflightnow.com/2020/11/06/ten-satellogic-earth-imaging-satellites-successfully-launched/
ÑuSat-13	https://spaceflightnow.com/2020/11/06/ten-satellogic-earth-imaging-satellites-successfully-launched/	Satellogic	Argentina	2020-11-06	2020	0.7	https://spaceflightnow.com/2020/11/06/ten-satellogic-earth-imaging-satellites-successfully-launched/
ÑuSat-14	https://spaceflightnow.com/2020/11/06/ten-satellogic-earth-imaging-satellites-successfully-launched/	Satellogic	Argentina	2020-11-06	2020	0.7	https://spaceflightnow.com/2020/11/06/ten-satellogic-earth-imaging-satellites-successfully-launched/
ÑuSat-15	https://spaceflightnow.com/2020/11/06/ten-satellogic-earth-imaging-satellites-successfully-launched/	Satellogic	Argentina	2020-11-06	2020	0.7	https://spaceflightnow.com/2020/11/06/ten-satellogic-earth-imaging-satellites-successfully-launched/
ÑuSat-16	https://spaceflightnow.com/2020/11/06/ten-satellogic-earth-imaging-satellites-successfully-launched/	Satellogic	Argentina	2020-11-06	2020	0.7	https://spaceflightnow.com/2020/11/06/ten-satellogic-earth-imaging-satellites-successfully-launched/
ÑuSat-17	https://spaceflightnow.com/2020/11/06/ten-satellogic-earth-imaging-satellites-successfully-launched/	Satellogic	Argentina	2020-11-06	2020	0.7	https://spaceflightnow.com/2020/11/06/ten-satellogic-earth-imaging-satellites-successfully-launched/
ÑuSat-18	https://spaceflightnow.com/2020/11/06/ten-satellogic-earth-imaging-satellites-successfully-launched/	Satellogic	Argentina	2020-11-06	2020	0.7	https://spaceflightnow.com/2020/11/06/ten-satellogic-earth-imaging-satellites-successfully-launched/
ÑuSat-9	https://spaceflightnow.com/2020/11/06/ten-satellogic-earth-imaging-satellites-successfully-launched/	Satellogic	Argentina	2020-11-06	2020	0.7	https://spaceflightnow.com/2020/11/06/ten-satellogic-earth-imaging-satellites-successfully-launched/
CORVUS BC5	https://spaceflightnow.com/launch-log/	Astro Digital	USA	2020-11-20	2020	22	https://space.skyrocket.de/doc_sdat/landmapper-bc.htm
FalconEye-2	https://spaceflightnow.com/2020/12/02/soyuz-rocket-launches-emirati-reconnaissance-satellite-after-lengthy-delay/	Airbus Defense and Space/Thales Alenia Space	France/UK/Germany/Spain	2020-12-02	2020	0.7	https://spaceflightnow.com/2020/11/29/soyuz-rocket-ready-to-launch-with-uaes-falcon-eye-2-military-satellite/
ET-SMART-RSS	https://www.nanosats.eu/sat/et-smart-rss	Beijing Zhixing Space Technology Co. Ltd	China/Ethiopia	2020-12-22	2020	unknown
Tianqi-8	https://spacenews.com/china-launches-first-long-march-8-from-wenchang-spaceport/	Guodian Gaoke	China	2020-12-22	2020	unknown
CSO-2	https://spaceflightnow.com/2020/12/29/french-military-surveillance-satellite-launched-by-soyuz-rocket/	Centre National D'études Spatiales (CNES)	France	2020-12-28	2020	0.2	https://space.skyrocket.de/doc_sdat/cso-1.htm

## Sheet: Chart1
	Satellite Launches Per Year
Year	Launches	Average Spatial Resolution (m)	Spatial Resolution (3 Year Moving Average)
1972	1	79
1974	1	120	92.6667
1975	1	79	179.667
1976	2	340	253
1977	2	340	440.333
1978	5	641	558.667
1979	4	695	458.667
1980	1	40	491.667
1981	3	740	358.333
1982	2	295	621.667
1983	3	830	563.333
1984	3	565	518.333
1985	1	160	388.333
1986	3	440	290
1987	3	270	365.733
1988	6	387.2	305.733
1990	4	260	365.4
1991	6	449	243
1992	1	20	163
1993	1	20	171.167
1994	5	473.5	313.125
1995	5	445.875	311.792
1996	1	16	341.014
1997	3	561.167	296.722
1998	5	313	386.499
1999	12	285.33	328.332
2000	5	386.667	229.999
2001	5	18	190.889
2002	8	168	94.6571
2003	7	97.9714	94.9905
2004	2	19	135.407
2005	5	289.25	207.883
2006	6	315.4	225.2
2007	10	70.95	140.151
2008	13	34.1036	115.08
2009	11	240.185	119.207
2010	6	83.3333	131.243
2011	11	70.2091	90.7215
2012	11	118.622	69.2904
2013	17	19.04	49.6484
2014	87	11.2829	28.3132
2015	64	54.6167	25.697
2016	48	11.1915	25.0589
2017	167	9.36848	21.4799
2018	29	43.8796	19.674
2019	48	5.7739	17.3372
2020	90	2.35802	4.06596

## Sheet: Chart2
	Satellite Launches Per Year
Year	Launches	Average Spatial Resolution (m)	Spatial Resolution (3 Year Moving Average)
1972	1	79
1974	1	120	92.6667	-92.6667
1975	1	79	179.667	-179.667
1976	2	340	253	-253
1977	2	340	440.333	-440.333
1978	5	641	558.667	-558.667
1979	4	695	458.667	-458.667
1980	1	40	491.667	-491.667
1981	3	740	358.333	-358.333
1982	2	295	621.667	-621.667
1983	3	830	563.333	-563.333
1984	3	565	518.333	-518.333
1985	1	160	388.333	-388.333
1986	3	440	290	-290
1987	3	270	365.733	-365.733
1988	6	387.2	305.733	-305.733
1990	4	260	365.4	-365.4
1991	6	449	243	-243
1992	1	20	163	-163
1993	1	20	171.167	-171.167
1994	5	473.5	313.125	-313.125
1995	5	445.875	311.792	-311.792
1996	1	16	341.014	-341.014
1997	3	561.167	296.722	-296.722
1998	5	313	386.499	-386.499
1999	12	285.33	328.332	-328.332
2000	5	386.667	229.999	-229.999
2001	5	18	190.889	-190.889
2002	8	168	94.6571	-94.6571
2003	7	97.9714	94.9905	-94.9905
2004	2	19	135.407	-135.407
2005	5	289.25	207.883	-207.883
2006	6	315.4	225.2	-225.2
2007	10	70.95	140.151	-140.151
2008	13	34.1036	115.08	-115.08
2009	11	240.185	119.207	-119.207
2010	6	83.3333	131.243	-131.243
2011	11	70.2091	90.7215	-90.7215
2012	11	118.622	69.2904	-69.2904
2013	17	19.04	49.6484	-49.6484
2014	87	11.2829	28.3132	-28.3132
2015	64	54.6167	25.697	-25.697
2016	48	11.1915	25.0589	-25.0589
2017	167	9.36848	21.4799	-21.4799
2018	29	43.8796	19.674	-19.674
2019	48	5.7739	17.3372	-17.3372
2020	90	2.35802	4.06596	-4.06596
